1                   **Data Matrix Normalization and Merging Strategies Minimize**  
2                   **Batch-specific Systemic Variation in scRNA-Seq Data**

3  
4           Benjamin R. Babcock<sup>1</sup>, Astrid Kusters<sup>1</sup>, Junkai Yang<sup>1</sup>, Mackenzie L. White<sup>1</sup>, Eliver E. B. Ghosn<sup>1,2,\*</sup>

5  
6       <sup>1</sup>Department of Medicine, Division of Immunology, Lowance Center for Human Immunology, Emory  
7       University School of Medicine, Atlanta, GA 30322, USA

8       <sup>2</sup>Emory Vaccine Center, Yerkes National Primate Research Center, Emory University School of Medicine,  
9       Atlanta, GA 30322, USA

10  
11   \*Corresponding author:

12   Eliver E.B. Ghosn

13   E-mail: [eliver.ghosn@emory.edu](mailto:eliver.ghosn@emory.edu)

16 **Abstract**

17 Single-cell RNA sequencing (scRNA-seq) can reveal accurate and sensitive RNA abundance in a single  
18 sample, but robust integration of multiple samples remains challenging. Large-scale scRNA-seq data  
19 generated by different workflows or laboratories can contain batch-specific systemic variation. Such  
20 variation challenges data integration by confounding sample-specific biology with undesirable batch-specific  
21 systemic effects. Therefore, there is a need for guidance in selecting computational and experimental  
22 approaches to minimize batch-specific impacts on data interpretation and a need to empirically evaluate the  
23 sources of systemic variation in a given dataset. To uncover the contributions of experimental variables to  
24 systemic variation, we intentionally perturb four potential sources of batch-effect in five human peripheral  
25 blood samples. We investigate sequencing replicate, sequencing depth, sample replicate, and the effects of  
26 pooling libraries for concurrent sequencing. To quantify the downstream effects of these variables on data  
27 interpretation, we introduced a new scoring metric, the Cell Misclassification Statistic (CMS), which  
28 identifies losses to cell type fidelity that occur when merging datasets of different batches. CMS reveals an  
29 undesirable overcorrection by popular batch-effect correction and data integration methods. We show that  
30 optimizing gene expression matrix normalization and merging can reduce the need for batch-effect  
31 correction and minimize the risk of overcorrecting true biological differences between samples.

32

## 33 Introduction

34 Recent advances in throughput and commercial availability of single-cell RNA-sequencing (scRNA-  
35 seq) technology have increased accessibility and led to widespread adoption of this technology by the  
36 scientific community (Supplementary Fig. 1). A single study may encompass thousands of cells from  
37 multiple samples, often spanning time points and conditions, resulting in large and heterogenous scRNA-  
38 seq datasets<sup>1,2</sup>. This dramatic shift is empowering scientists to massively profile multiple samples in parallel  
39 at extremely high resolution. As experiments grow more complicated, the need arises to align and co-  
40 analyze ever larger and more diverse outputs of single-cell workflows.

41 Minute and often uncontrollable technical variations in sample collection and data processing can  
42 manifest as noticeable effects which confound the interpretation of data<sup>3</sup>. This systemic variation, referred to  
43 commonly as “batch-effect,” can pose an obstacle to data interpretation by confounding biologically-derived  
44 variation (desirable) with technically-derived variation (undesirable). An inability to discern the source of a  
45 particular signal can even lead to over-interpretation of data, in that systemic variation arising from technical  
46 differences may be interpreted as a biologically driven phenotypic difference. A typical case in which batch-  
47 effect confounds data interpretation will present as an over-merging or under-merging of cell types.  
48 Uncorrected batch-effect can cause similar cell populations between samples to appear divergent. In the  
49 inverse case, batch-effect can cause two biologically distinct populations to appear as one due to a shared  
50 technical signal. Both the prevalence and persistence of batch-specific signals have been highlighted by  
51 prior work, as well as the spectrum of methods existing to correct and remove them<sup>4,5</sup>. However, there  
52 remains an insufficient understanding of how experimental design and data analysis approaches play a role  
53 in producing batch-effect or identifying batch-effect when present in a sample. An understanding of the  
54 source of batch-effect and the informed selection of tools to identify batch-effect has the potential to alter  
55 the outcomes and conclusions of scRNA-seq studies.

56 Technical sources of variation most apparently manifest themselves in the Principal Component  
57 Analysis (PCA) matrix, representing a shared low-dimensional space. Therefore, isolation and removal of  
58 these effects in PCA dimensions are critical, as PCAs are the foundation used to produce cell cluster

59 assignments and UMAP visualizations. Towards this aim, many methods have been applied to isolate and  
60 remove batch-effect from scRNA-seq data<sup>6-11</sup>. These methods try to merge biologically similar populations  
61 into a shared low-dimensional space while disregarding the influence of undesirable signals. A commonly  
62 shared assumption of current methods is that batch-specific, technically-derived signals are contained  
63 *within* the sample, while true biologically-derived signals are shared *between* samples. However, current  
64 methods are mostly agnostic to the fundamental sources of systemic variation and the underlying biological  
65 heterogeneity contained within each sample.

66 Here, we present a novel approach to validating batch-correction methods by demonstrating  
67 experimental variables which contribute most to systemic variation. To assess the degree of batch-effect,  
68 we introduce a biologically-grounded metric, the Cell Misclassification Statistic (CMS). While most current  
69 scoring systems are agnostic to cell identity, the CMS directly grounds itself in the cell-type classification of  
70 every single cell and is therefore uniquely able to quantify the loss of biological information during sample  
71 merging. Using CMS to quantify batch-associated systemic variation, we show that sequencing replicates  
72 and sequencing depth contribute only minimally to batch-effect and that pooling samples together for  
73 sequencing does not meaningfully improve the measured or observed batch-effect. Instead, we find that  
74 sample donor, along with the microfluidic encapsulation and library preparation steps, represent the main  
75 source of batch-associated variation. We test three popular batch-correction algorithms (Harmony<sup>8</sup>,  
76 LIGER<sup>11</sup>, and Seurat V3<sup>10</sup>), which have been previously scored as the best performing<sup>5</sup>. Our CMS scoring,  
77 which accounts for cell identity as a biological feature, revealed misclassifications of major cell lineages in  
78 all three commonly used batch-correction methods. We further applied CMS in a supervised approach to  
79 reveal that selecting a proper dataset normalization and merging strategy can perform comparably to  
80 popular batch-correction algorithms. Furthermore, we revealed that much of the batch-effect present is due  
81 to low expression levels of broadly expressed genes, which can be minimized by selecting a proper  
82 normalization and dataset merging strategy. Our unique and biologically-grounded approach allows for  
83 effective data integration in a carefully supervised workflow without the need for corrective algorithms.

## 84 **Results**

### 85 **A Cell Misclassification Statistic quantifies data integration and batch-correction fidelity**

86 We generated seven single-cell RNA-seq datasets from five individual donors of human peripheral  
87 blood mononuclear cells (PBMCs) (Fig. 1a). To quantify the contributions of known variables to batch effect  
88 and evaluate the performance of data integration and batch correction methods, we developed a cell  
89 misclassification statistic (CMS) metric (Fig. 1b). CMS is grounded in the premise that if different systems  
90 identify a single cell as different biological types, both cannot be correct. To calculate a CMS, we first gather  
91 the cell-type identities obtained by classifying cells from only a single sample, meaning that all cells were  
92 processed under identical conditions and are influenced identically by potential technical sources of  
93 variance, if at all. Then, to calculate a CMS score, we compare the cell-type classifications of each sample  
94 individually to cell-type classifications after multiple sample merging. We measure the fraction of cells that  
95 have changed classification and generate a statistic, such that a CMS score of 0 means that no cells  
96 changed classification/cell-type identity after merging datasets, while a CMS of 0.2 means a  
97 misclassification of 20% of cells. A higher CMS score will result when cell barcodes change cell-type identity  
98 after sample merging and indicates over-correction of the sample. By relying on invariable biological  
99 principles (a single, non-doublet cell barcode must hold only one cell classification), we directly interpret  
100 CMS scores as a measure of biological signal loss during data integration.

101 To produce the initial cell type classifications required for CMS, we analyzed seven datasets  
102 generated from five PBMC samples. Each dataset contained two matrices holding independent modalities  
103 of data: gene expression (GEX) and antibody-derived tag (ADT) cell-surface protein expression. First, we  
104 confirmed the cell types present in each single sample by removing an aliquot of cells and performing flow  
105 cytometry staining and analysis by a gold-standard “gating strategy” approach (representative data shown  
106 in Supplementary Fig. 2). In parallel, we processed the GEX sequencing data to generate clusters  
107 according to the Seurat V3 workflow, following default settings<sup>10</sup>. We next assigned each cluster to a major  
108 lineage using both ADT and GEX markers based on a gating strategy similar to flow cytometry, as we have  
109 previously reported<sup>12</sup> (representative data shown in Supplementary Fig. 3). With cell-type classifications

110 independently established for each sample, we can assess the impacts of batch-effect on cell-type  
111 classification in merged datasets.

112 CMS measures consistency in cell-type classification, which is only one of two metrics we used to  
113 validate data integration. Another important aspect of data integration and batch correction methods is  
114 generating UMAP embeddings for data visualization. To assess the performance of UMAP embeddings for  
115 visualization of integrated datasets, we employed a modified Local Inverse Simpson's Index (LISI)<sup>8,13</sup>, which  
116 we used specifically to measure the final UMAP integration, or integration LISI (iLISI) (Fig. 1b). In our  
117 system, an iLISI score of 1 represents a UMAP completely segregated by sample ID, while an iLISI of 0  
118 represents a perfectly integrated UMAP. Therefore, the best-integrated data will have both CMS and iLISI  
119 scores approaching 0, while the most segregated data will return both CMS and iLISI scores approaching 1  
120 (Fig. 1b). As described below, we applied the CMS and iLISI methods to compare the fidelity of the various  
121 data-integration/batch-correction methods we evaluated in this study.

122

### 123 **Batch-associated systemic variation is observed when sample replicates and sequencing depth are** 124 **perturbed, but not sequencing replicate**

125 To examine the contributions of experimental variables to batch-associated data effects, we first  
126 describe four unique steps of a typical scRNA-seq workflow in which sample-specific variation may be  
127 introduced:

- 128 1. Sample donor
- 129 2. Sample and library preparation
- 130 3. Library sequencing
- 131 4. Data analysis

132 The sample donor (i) represents the baseline variation intrinsic to each human subject who donated blood  
133 for this study. Sample preparation (ii) includes the processes of extracting cells from donor tissue and  
134 preparing a single-cell suspension (the sample) (Fig. 1a). Together, sample and library preparation (ii)  
135 encompasses all steps spanning microfluidic encapsulation of donor cells through to the generation of a

136 barcoded cDNA library (Fig. 1a). (Note: As sample and library preparation will largely be tissue and  
137 platform-specific and will not typically be varied for a single-donor aliquot of cells, we consider them here as  
138 processes intrinsically linked to sample donor and not as independent sources of batch-effect). Library  
139 sequencing (iii) consists of converting the cDNA molecules (i.e., barcoded libraries) into aligned reads, and  
140 finally, an expression matrix of gene counts per cell (Fig. 1a). Data analysis (iv) constitutes the last unit of  
141 the workflow. During data analysis, we make interpretations on the expression matrix by assigning cell type  
142 IDs to cell barcodes and clusters, visualizing cells by UMAP embeddings, and detecting differential gene  
143 expression (DGE) (Fig. 1a). To evaluate the contributions of each of these steps (i-iv) to batch-effect, we  
144 knowingly introduced differences in key variables to sets of human PBMC samples and evaluated the  
145 downstream batch-effect observed. Finally, we directly evaluated whether pooling libraries for concurrent  
146 sequencing could reduce sample-associated batch-effect compared to the same libraries sequenced  
147 independently.

148 Sample donor: We assessed the systemic batch variation in identically-prepared PBMC samples from three  
149 healthy adult donors (samples 1-3, Supplementary Table 1). We processed samples simultaneously for  
150 PBMC isolation, single-cell encapsulation, and barcoded cDNA library generation. Following library  
151 preparation, we pooled samples for simultaneous sequencing. Depth of sequence (reads per cell) was not  
152 significantly different between samples (Wilcoxon rank-sum test,  $p = 0.3487, 0.2445, 0.8471$  for samples 1,  
153 2, 3, respectively), and we proceeded with 16,946 cell barcodes after concatenating the GEX matrices.  
154 Next, we assigned each cluster to a cell type using both GEX and ADT data (Supplementary Fig. 3). After  
155 sample merging, the three PBMC samples were mostly segregated by donor when visualized on a UMAP  
156 (Fig. 2a). The failure to effectively integrate the three samples, as readily apparent in the UMAP embedding,  
157 was confirmed by our modified iLISI scoring (iLISI = 0.861, Fig. 2a). We then applied CMS scoring and  
158 revealed approximately ten percent cell-type misclassification after sample merging (CMS = 0.099, Figs. 2a  
159 and Supplementary Fig. 4). Hence, we demonstrate that sample-specific variations cause a loss of  
160 biological signal in the integrated data analysis and contribute to undesirable batch-associated data effects.

161 Library Sequencing Replication: To demonstrate the contributions of library sequencing to systemic  
162 variation, we aliquoted a single library in two and performed duplicate sequencing under similar conditions  
163 (samples 4-A and 4-B) (Fig. 2b). We sequenced each aliquot in a separate flow cell, on different days, with  
164 similar target sequence depth (~40,000 reads/cell) (Fig. 2b). After merging, the dataset contained  
165 approximately 13,000 cells, representing a shared set of approximately 6,500 barcodes, duplicated. We  
166 found that 6,392, or greater than 99 percent, of cell barcodes, were shared between both sequencing  
167 replicates, indicating minimal new cells were identified by additional sequencing. As above, we followed a  
168 default Seurat workflow to generate UMAP visualizations and Louvain clusters (Fig. 2c) and used the GEX  
169 and ADT data to classify clusters by cell type. We constructed a table of the proportion of each sample that  
170 contributed to each cell type and cluster (Supplementary Table 2). As both libraries are derived from two  
171 aliquots of the same cDNA pool, we would expect the proportions of cell types to be equal by replicate,  
172 which they were (Supplementary Table 2; chi-square test,  $p = 1$ ). Scoring the replicates by iLISI confirmed a  
173 homogenous distribution of replicates in the UMAP (iLISI = 0.030) while CMS revealed only 3.2% of cells  
174 changed classification (CMS = 0.032, Supplementary Fig. 4), which represents fewer cells than the  
175 expected cell-cell doublet rate for this technology. Hence, we find that variation introduced by library  
176 sequencing was a non-significant contributor to batch-effect by all measures.

177 Library Sequencing Depth: Next, we quantified the effect of sequencing depth by intentionally altering the  
178 number of reads between replicates. For this comparison, we constructed two identical aliquots of a PBMC  
179 library containing approximately 4,000 cells, sequenced to different depths (samples 5-A and 5-B) (Fig. 2b).  
180 Sample 5-B contained three-fold more total reads than sample 5-A (170M reads for 5-A vs. 560M reads for  
181 5-B). Notably, we sequenced samples 5-A and 5-B on the same Illumina flow cell as samples 4-A and 4-B,  
182 respectively, from the experiment above (Fig. 2b). Having already established that library sequencing  
183 replication (i.e., sample 4) produced minimal batch-effect (Fig. 2c), we interpret that any differences  
184 observed between samples 5-A and 5-B can be attributed to sequence depth. We recovered similar  
185 numbers of cells per replicate, resulting in averages of 45,160 reads/cell in sample 5-A and 138,274



186 reads/cell in 5-B, with 94% overlap in cell barcode sequences (3,758 of 4,007). Of the 249 non-shared cell  
187 barcodes, all were present only in 5-B, the sample with greater sequencing depth (i.e., higher reads/cell). As  
188 before, we analyzed the gene expression matrices following the Seurat workflow under default settings and  
189 assigned cell types using a GEX and ADT-based gating approach (Fig. 2d). Surprisingly, in this comparison  
190 cell-type compositions were biased by sequencing replicate (Supplementary Table 2; chi-square,  $p <$   
191  $2.2 \times 10^{-16}$ ) while iLISI and CMS scores remained favorable (iLISI = 0.028, CMS = 0.033). One notable cell  
192 type, erythrocytes, stood out as batch-biased: 0.3% of total cells in sample 5-A were classified as  
193 erythrocytes, compared to 5% in 5-B. Indeed, removing the erythrocyte-classified population resulted in a  
194 homogenous composition of cell types by sample (Supplementary Table 2; chi-square,  $p = 1$ ). Removing  
195 erythrocytes also improved the CMS score from 0.033 to 0.017, still well below the expected cell-cell  
196 doublet rate.

197 We hypothesized that erythrocyte-classified barcodes appeared only in the greater read depth  
198 sample because they contain fewer unique molecular identifiers (UMIs), requiring more reads to capture  
199 their relatively rare transcripts. We confirmed that erythrocytes did contain fewer unique mRNA molecules  
200 (Supplementary Fig. 5, Wilcoxon rank-sum test,  $p < 2.2 \times 10^{-16}$ ). In addition, we observed that hematopoietic  
201 stem and progenitor cells (HSPCs) co-clustered with erythrocytes, which may explain the few high-UMI dots  
202 present in Supplementary Fig. 5. We also confirmed that sample 5-B (the higher read-depth sample)  
203 contained more UMIs per cell than sample 5-A (Supplementary Fig. 5, Wilcoxon rank-sum test,  $p =$   
204  $1.482 \times 10^{-10}$ ), and that sample 5-B also contained more unique genes per cell (Supplementary Fig. 5,  
205 Wilcoxon rank-sum test,  $p < 2.2 \times 10^{-16}$ ). As a standard part of the 10X Genomics Cell Ranger workflow (i.e.,  
206 the sequencing read alignment and demultiplexing steps), cell barcodes with low-UMI counts are excluded  
207 as potential empty droplets containing ambient mRNA/noise. To confirm that the erythrocyte cell barcodes  
208 unique to sample 5-B were also present in the aliquot sequenced for 5-A but instead had been artificially  
209 excluded as low-UMI barcodes, we investigated the unfiltered sequencing matrices of sample 5-A. We  
210 discovered 100% of cell barcodes specific to 5-B were contained within the unfiltered 5-A data matrix but  
211 were excluded as part of the Cell Ranger quality control steps. Only in sample 5-B, the high-depth replicate,

212 were enough UMIs sequenced to distinguish erythrocytes from ambient noise. Hence, our results  
213 demonstrate that imbalanced sequencing depth may result in cell type biases, contributing somewhat to  
214 batch-associated data effects.

215 Pooled Library Sequencing: It is widely assumed that technical effects can be minimized by pooling libraries  
216 for sequencing in a single batch. However, we demonstrate above that duplicated sequencing of identical  
217 library aliquots can yield highly similar results with minimal batch-specific variation (Fig. 2c). To directly  
218 evaluate the benefits of sequencing libraries together in a single pool, compared to sequencing un-pooled  
219 libraries independently, we again analyzed the sequenced replicates of PBMC samples 4 and 5 (samples 4-  
220 A, 4-B, and 5-A). We do not expect samples 4 and 5 to be identical, as they originate from different sample  
221 donors. However, we will directly contrast the analysis of merged samples 4-A/5-A, which we sequenced in  
222 a single pool, against the analysis of merged samples 4-B/5-A, which we sequenced in different pools (see  
223 experimental design, Fig. 3a). If indeed pooled sequencing alleviates batch-effect, we would expect to  
224 identify less batch-specific variation (lower iLISI and CMS scores) when merging samples that were pooled  
225 for sequencing together (samples 4-A vs. 5-A) as compared to un-pooled samples sequenced separately  
226 (samples 4-B vs. 5-A). Notably, we sequenced all samples for these comparisons to a highly similar read  
227 depth (~40,000 reads/cell). Surprisingly, we find that pooling libraries for sequencing yields nearly identical  
228 results as sequencing unpooled libraries independently (Figs. 3b-c). Cell misclassification rates rose  
229 compared to the previously presented experiments of duplicated sequencing of identical libraries (Fig. 2d)  
230 but remained constant between pooled and un-pooled comparisons (CMS = 0.070 and 0.070, respectively).  
231 The UMAP homogeneity similarly remained near-constant between pooled and un-pooled sequencing  
232 batches (iLISI = 0.279, 0.295, respectively; Figs. 3b-c). Our results assert that pooling libraries for  
233 sequencing neither reduced nor contributed to a major source of batch-associated data effects in these  
234 samples.

235

## 236 **Commonly used batch-effect correction and data integration methods imperfectly resolve batch-** 237 **associated systemic variation**

238 We examined the extent to which commonly cited data integration algorithms can minimize the  
239 batch-specific systemic variation we quantified in the prior experiments. Above, we showed that the sample  
240 donor variable significantly confounded our ability to correctly assign cell types and resulted in a sample-  
241 biased UMAP from a merged dataset (samples 1-3; Fig. 2a, iLISI = 0.861). Here, we attempt to improve the  
242 low-dimensional embeddings (i.e., UMAP and clusters) and the robustness of cell-type classifications by  
243 applying commonly-used batch-effect correction algorithms. First, we selected three of the most cited  
244 packages for integrating gene expression data: Harmony<sup>8</sup>, LIGER<sup>11</sup>, and Seurat V3 (SCTransform and data  
245 anchoring)<sup>6,10</sup>, which have been established as the best performing by prior study<sup>5</sup>. Next, we followed the  
246 default workflow settings recommended by the respective publications and applied each method to our  
247 PBMC samples 1-3. Finally, we generated UMAP embeddings and cluster/cell-type assignments to assess  
248 each corrected dataset (Fig. 4).

249 We first evaluated Harmony, implemented through the Seurat function “RunHarmony”<sup>8,14</sup>. Although  
250 homogeneity of the UMAP is greatly improved (Fig. 4a; iLISI improved from 0.861 to 0.183), CMS scoring of  
251 the harmonized sample revealed a greater loss of cell-type fidelity (Fig. 4a; CMS rose from 0.099 to 0.154).  
252 Interestingly, the increased proportion of cell-type misclassification (from 9.9% in the uncorrected sample to  
253 15.4% in the harmonized sample) comes largely from over-merging CD4<sup>+</sup> and CD8<sup>+</sup> T cells into mixed-  
254 lineage clusters (Figs. 4a and Supplementary Fig. 4). This highlights the potential to over-homogenize data  
255 while ignoring specific cell type-exclusive signals.

256 We next tested LIGER, as implemented through the R package “rliger” and the Seurat functions  
257 “RunOptimizeALS” and “RunQuantileNorm”<sup>11,15,16</sup>. We generated a UMAP from the LIGER integrative non-  
258 negative matrix factorization (iNMF) components (Fig. 4b). LIGER produced a homogeneously distributed  
259 UMAP (Fig. 4b; iLISI = 0.132) but severely over-merged clusters, resulting in a major loss of cell-type  
260 information for nearly one-quarter of all cells, as measured by a severely increased CMS score (Fig. 4b;  
261 CMS rose from 0.099 to 0.257). As with Harmony, the most affected cell types were the CD4<sup>+</sup> and CD8<sup>+</sup> T

262 cells. LIGER could not differentiate those two distinct subsets of T cells (Supplementary Fig. 4) and incurred  
263 a misclassification cost of greater than 25% of cells (i.e., CMS = 0.257).

264 Lastly, we evaluated the performance of Seurat V3, as implemented through the Seurat  
265 SCTransform and data anchoring workflows<sup>6,17</sup>. Data integration by Seurat V3 resulted in improved  
266 homogeneity of UMAP embeddings (Fig. 4c; iLISI improved from 0.861 to 0.191), accompanied by an  
267 increase in CMS scores compared to uncorrected data (Fig. 4c; CMS rose from 0.099 to 0.182). Again, as  
268 with both Harmony and Liger, the Seurat data integration methods were unable to effectively segregate  
269 subsets of CD4<sup>+</sup> and CD8<sup>+</sup> T cells (Supplementary Fig. 4). We conclude that similar yet transcriptionally  
270 distinct types of PBMCs pose a problem for data integration methods as all three failed to resolve these  
271 specific T-cell subsets. While we focus our subsequent efforts on detailing the batch-effect impacting T-cell  
272 subsets, it is important to note that these effects were global and impacted other major lineages, including  
273 NK cells, B cells, and monocytes (Supplementary Fig. 4). Crucially, each method generated a different set  
274 of clusters when applied to the same merged dataset (Fig. 4), highlighting a potential to misinterpret results  
275 from a single method, especially when relying on clusters as a meaningful descriptor of biological status.  
276 Notably, by applying the CMS score, we are uniquely able to reveal and quantify the hazards that dataset  
277 integration can pose to data interpretation.

278

### 279 **Optimized dataset normalization and scaling before integration resolves batch-effect without the** 280 **need for batch-correction methods**

281 We showed that batch-specific variations negatively impact UMAP embeddings (iLISI scores) and  
282 cell-type classifications (CMS scores) in merged samples, and yet commonly-used batch-correction  
283 methods imperfectly resolve these effects (Figs. 2 and 4). Hence, we sought to identify and optimize the  
284 specific data processing steps which can influence downstream UMAP embeddings and clustering. We  
285 focused on the steps of data normalization and data scaling, which are required to produce comparable  
286 transcript counts between cells and across genes, and must be applied prior to any PCA and downstream  
287 UMAP and clustering. To quantify the effect of data normalization and scaling on resolving batch-associated

288 systemic variation, we applied two unique data normalization and scaling methods with two different data  
289 pooling workflows to generate a total of four datasets for comparison (Fig. 5).

290 We first evaluated the common normalization/scaling method of log-transformation and gene  
291 centering, as implemented by Seurat methods `NormalizeData` and `ScaleData`<sup>10</sup>. Because each cell has a  
292 different number of UMI sequenced, `NormalizeData` divides gene count values by the total number of read  
293 counts per cell and multiplies by a scaling factor (10,000 by default). The result is a scaling of each cell to a  
294 total of 10k UMIs to avoid the effect of a different sequencing depth across cell types in a sample.  
295 `NormalizeData` then adds a pseudocount of 1 (to avoid transcript zero-values) and takes the natural log of  
296 each count. In this way, we normalize cells for per-cell sequencing depth, fostering more similar cell-cell  
297 comparisons. The data requires further scaling, however, to stabilize the relationship between gene  
298 expression level and variance. `ScaleData` employs a simple gene-level centering and scaling, meaning that  
299 each gene will be mean-centered to zero and expression values scaled by the standard deviation. The  
300 resulting scaled values (a z-score) are clipped to a maximum (default of 10) to reduce the effect of outlier  
301 high-variance genes expressed by a minority subset of cells.

302 The second method evaluated is the `SCTransform` method included in Seurat V3<sup>10</sup>. Briefly,  
303 `SCTransform` models UMI counts using a regularized negative binomial model to remove the cell-cell  
304 variation caused by differing sequencing depth between cell barcodes. In accomplishing this, `SCTransform`  
305 pools genes with similar abundance to obtain stable parameter estimates, preventing the overfitting caused  
306 by a global scaling model. In this way, `SCTransform` simultaneously corrects for influences of both total UMI  
307 and mean expression on the gene variance.

308 We applied the above two normalization/scaling methods to PBMC samples 1-3, which had the  
309 greatest batch-effect in our prior experiments (Fig. 2a), and which were ineffectively integrated by common  
310 batch-effect correction algorithms (Fig. 4). Importantly, each dataset was processed by each method, either  
311 log-normalization and scaling (Fig. 5a) or `SCTransform` (Fig. 5b), both prior to data merging or after data  
312 merging as a single unified/concatenated dataset. We then assessed the differences in the final UMAP  
313 visualization and cluster compositions and generated iLISI and CMS scores for each method (Figs. 5 and

314 Supplementary Fig. 4). SCTransform normalization produced undesirable results, showing greater numbers  
315 of cell-type misclassification (high CMS scores) and sample-stratified UMAP embeddings (high iLISI  
316 scores), irrespective of whether it was performed prior to or after dataset merging (Fig. 5b; CMS = 0.202  
317 and iLISI = 0.416 prior to merging; CMS = 0.204 and iLISI = 0.559 after merging). We identified one  
318 method, log-normalization with mean-centering performed on each sample independently and prior to data  
319 merging, that produced the best homogenized UMAP (Fig. 5a; iLISI = 0.211). However, nearly one in every  
320 six cells was misclassified after dataset merging (Fig. 5a; CMS = 0.159). In contrast, the same  
321 normalization/scaling method performed after dataset merging showed a highly stratified UMAP embedding,  
322 even though it had the best CMS score (Fig. 5a; iLISI = 0.861, CMS = 0.099). The simple default methods  
323 of log-normalization with mean-centering performed prior to dataset merging surprised us by their ability to  
324 nearly match the performance of dedicated batch-effect correction algorithms (Figs. 4 and 5a).

325 Taken together, our results implicate data normalization and scaling as an effective method to de-  
326 emphasize the systemic variation present in the sample-specific data matrix, performing similarly to the  
327 Harmony and Seurat V3 batch-effect correction methods. However, even the best normalization  
328 approaches led to high levels of cell misclassification, which carry a dangerous potential for  
329 misinterpretation of data and false conclusions.

330

### 331 **Low levels of highly variable transcripts are associated with batch-effect**

332 We show above that normalization and merging strategies can have dramatic impacts on the  
333 observed levels of batch-effect. Here, we attempt to isolate the gene transcripts, which may be responsible  
334 for the batch effects observed when the integrated samples are normalized differently.

335 Zero-count gene transcripts can indicate either the true absence of a transcript, or that the  
336 expression level of a given transcript is very low and may not be captured by the assay, resulting in what is  
337 known as gene “dropout” events. Both true zero-count transcripts and gene dropouts account for a large  
338 proportion of the gene expression matrix and can contribute significantly to batch-effect<sup>18,19</sup>. One key  
339 difference between general normalization methods commonly used for bulk RNA-seq and those specifically

340 developed for scRNA-seq is the ability to cope with excessive zeros in the scRNA-seq data matrix<sup>18</sup>. Hence,  
341 we reasoned that low expression level transcripts (fewer than 5 UMI) may be susceptible to gene dropout  
342 (i.e., zero-count transcripts) and that proper normalization may minimize the effect of these low expression  
343 level genes.

344 To identify precisely how normalization methods could improve cell-type classification, we first  
345 isolated the misclassified cells of sample 1, the individual sample with the greatest total cell-type  
346 misclassification (i.e., highest CMS score) of the PBMCS samples 1-3 (Figs. 2a, 4, and 5). We found that a  
347 specific group of cells in sample 1, the CD8<sup>+</sup> T cells, frequently changed their initial classification when the  
348 cell-typing workflow to classify clusters (Supplementary Fig. 3) was repeated/validated after sample  
349 merging. This group of CD8<sup>+</sup> T cells was prone to inappropriately co-cluster with NK cells, along with  
350 another group of CD8<sup>+</sup> T cells which were co-clustered with CD4<sup>+</sup> T cells and regulatory T cells (Fig. 6a).  
351 Notably, this observation was not exclusive to a single computational workflow (Supplementary Fig. 4) and  
352 was repeated across all normalization methods tested (Fig. 5).

353 We next sought to identify the specific gene transcripts which can distinguish the misclustered CD8+  
354 T cells of sample 1 from the CD8<sup>+</sup> T cells of samples 2 and 3. We directly performed differential gene  
355 expression (DGE) analyses between the misclassified CD8<sup>+</sup> T cells of sample 1 vs. the correctly classified  
356 CD8<sup>+</sup> T cell cluster using a likelihood ratio test for differential expression, as implemented by Seurat  
357 “FindMarkers” function<sup>10,20</sup>, and identified a set of significant differentially-expressed genes (Fig. 6b). Next,  
358 to restrict this list to genes that could directly influence the UMAP and clusters, we retained only genes  
359 detected as “highly variable genes” (HVGs). Only HVGs are included as input to the PCA, which is used as  
360 the input for the downstream UMAP and clustering. Finally, to assess whether the genes in our list could  
361 cause batch effect, we excluded the genes that were in the HVGs of the dataset that showed the least batch  
362 effect (Fig. 5a, left panel). The final list is a limited set of genes that are differentially expressed between the  
363 CD8<sup>+</sup> T cells of sample 1 and the samples 2/3, are capable of influencing PCA (and downstream UMAP and  
364 clustering), and are present in the HVGs of datasets which show strong batch effect. This final list of 26  
365 genes is presented in Fig. 6b.



366 For 23 out of 26 genes present in this final list, the median transcript count (of cells with nonzero  
367 transcripts) was two or fewer copies (i.e.,  $\leq 2$  UMI). The more highly expressed genes were all ribosomal  
368 subunits (*RPS26*, *RPS4Y1*, *RPS4X*), which had median transcript counts of 8, 3, and 18 UMIs, respectively  
369 (Fig. 6b). Remarkably, we show that specific removal of these genes from the HVGs of samples 1-3  
370 resulted in a marked improvement in data integration without the need for any other optimization (Fig. 6c).  
371 iLISI scores improved from 0.861 to 0.313, and CMS scores approached the scores achieved by the best  
372 batch-correction and normalization approaches (CMS = 0.175). Therefore, our results show that the  
373 selection of normalization/scaling and sample merging workflow plays an important role to either exacerbate  
374 or minimize batch-associated systemic variation by properly controlling contributions of low-expression  
375 genes to the total variance of the sample. In conclusion, here, we experimentally demonstrated the various  
376 sources of batch-associated effects and developed a new scoring system that takes into account cell-type  
377 identity as a key biological feature in data integration efficiency. Taken together, these results can inform  
378 the optimal experimental design, and data integration approaches.

379

380



## 381 Discussion

382 As accessibility to scRNA-seq dramatically increases, so too do the challenges of integrating and co-  
383 analyzing diverse datasets. One challenge to integrating multiple scRNA-seq samples is the influence of  
384 batch-specific technical variance on UMAP visualization and clustering. Here, we apply our novel Cell  
385 Misclassification Statistic (CMS) score alongside a modified Local Inverse Simpson's Index (iLISI) scoring to  
386 reveal previously unclarified sources of these batch-specific effects and the potential dangers of using  
387 batch-correction algorithms. We conclude that batch-effect can be partially mitigated by supervised  
388 optimization of normalization and scaling methods, which work by minimizing the influence of low-  
389 expression gene transcripts.

390 Existing batch-correction scoring metrics such as Local Inverse Simpson's Index (LISI)<sup>8,13</sup> or  
391 Average Silhouette Width (ASW)<sup>21</sup> quantify the mixing of merged samples in either the integrated clusters or  
392 in the final integrated UMAP. However, these and other current batch-correction approaches remain  
393 agnostic to the biology of each cell, such that potential cell-type misclassification after data integration is not  
394 considered in the analysis. Yet, as we show here, cell-type misclassification is a pervasive phenomenon in  
395 data integration and can dramatically influence data interpretation. Therefore, we contend that in addition to  
396 measuring optimal mixing of integrated samples (e.g., LISI or ASW), the potential for cell-type  
397 misclassification post sample merging must be taken into account when evaluating the fidelity of batch-  
398 correction and data integration methods.

399 In this study, we developed the CMS score to directly measure cell-type misclassification that often  
400 occurs following batch correction and data integration. CMS differs from existing approaches such as  
401 LISI<sup>8,13</sup> or ASW<sup>21</sup> in that CMS quantifies batch-integration based on a known biological classification of cells,  
402 rather than by simply measuring the mixing of different samples. CMS is uniquely sensitive to the incorrect  
403 merging of dissimilar cell types caused by the over-homogenization of datasets. To complement these  
404 strengths, we combine CMS with a modified LISI score, or the integration LISI (iLISI), to measure the  
405 efficiency of the UMAP integration. iLISI is uniquely sensitive to detecting the under-merging of similar  
406 samples, a phenomenon that can result in a UMAP that is segregated by sample instead of cell type. We

407 find that the biologically-grounded measures produced by our CMS scoring prove to be a robust indicator of  
408 cell-type fidelity post data integration, while our modified iLISI scoring is an excellent benchmark of UMAP  
409 integration. We demonstrate the ability of this combined CMS and iLISI approach to measuring the most  
410 impactful contributors to batch-effect between samples.

411 Using CMS and iLISI, we reported the ability of common experimental variables to influence the  
412 biological interpretation of clusters. In isolation, replicating the library sequencing did not cause any  
413 significant loss in cell-type fidelity, while sequencing depth and sample donor both did. However, the effects  
414 of sequencing depth were contained entirely within a single, defined cell type while sample donor effects  
415 (which include the entangled effects of microfluidic encapsulation and library preparation) were widespread  
416 across all cells surveyed. While we identified this phenomenon on PBMCs here, we would expect similar  
417 results in other heterogeneous tissues, both with regards to sequencing depth and the effects of sample  
418 donor. Pooling PBMC libraries for sequencing together or sequencing libraries independently did not  
419 change the observed batch effect. This suggests that pooling libraries for sequencing together may not  
420 supply a significant benefit to experimental design or effectively prevent batch-associated systematic  
421 variation. We emphasize the critical role of CMS scores in quantifying cell-type fidelity, which helped us to  
422 conclude that sample donor is the major contributing variable to batch-effect in the PBMCs evaluated.

423 While PBMC populations may subtly differ between healthy adult donors, we should be able to pool  
424 PBMCs from different donors for the purposes of constructing a reference sample (i.e., a healthy control  
425 sample or a cell atlas). To integrate PBMCs from different donors, we applied three popular and often cited  
426 batch-correction algorithms<sup>5</sup> (Harmony<sup>8</sup>, LIGER<sup>11</sup>, and Seurat V3<sup>10</sup>). Although, as expected, we find that all  
427 three methods effectively integrated UMAP embeddings, we show that explicit batch-correction may be  
428 unnecessary and, in some cases, even harmful. By selecting a suitable normalization and merging strategy  
429 through a CMS-guided approach, we produced cell-type integration results comparable to the best batch-  
430 correction algorithms. We endorse a supervised approach (such as our CMS-guided optimization) over  
431 selecting a batch-correction method for the following reasons: while batch-correction methods do not  
432 directly adjust the gene expression matrix, they do affect the dimensional reduction matrix and therefore

433 cluster assignments, which are used to infer cell-type identity. Most significantly, each batch correction  
434 method evaluated here produced subtly different cluster assignments from the same data, which could  
435 provoke a dangerous potential to misclassify cells and misinterpret results. Therefore, we caution against  
436 the application of batch-effect correction methods as a “fix” for systemic batch-effect and place emphasis on  
437 the proper, supervised selection of appropriate normalization methods. The choice of the best approach  
438 may be aided by a measure such as CMS, or similar, which directly measures the impact of any  
439 computational approach on biologically assigned cell-type classifications. By directly quantifying the level of  
440 biological signal loss, we can reveal systemic variation that may otherwise go undetected.

441 To complete our study, we investigated the most symptoms of such systemic variations on the gene  
442 expression matrix. We identified the cells most sensitive to misclassification and highlighted a pattern of  
443 gene expression which distinguished them from the similar cell type, but correctly classified cells, of the  
444 other samples. The differentially expressed genes between the misclassified and correctly classified cells  
445 reveal a broad pattern of expression with a low total expression level. We find that, depending on the  
446 normalization/merging strategy chosen, these genes may be excluded from the highly variable gene (HVG)  
447 list. Strikingly, we show that simple exclusion of these genes significantly improves batch-effect but is  
448 insufficient to eliminate all batch-effect in an improperly normalized/merged sample. This suggests that  
449 more sources of variation may be present, which cannot be corrected by gene curation alone. We conclude  
450 that removing problematic genes *post-hoc* is insufficient and that optimizing the normalization/merging  
451 strategy is the best approach to consistently reduce sample-specific variance and highlight biologically  
452 relevant signals.

453 Together, our experiments describe the variables which contribute most to batch-effect (sample  
454 donor, sequencing depth) and those which do not significantly contribute (sequencing replicate, sequencing  
455 pool). We apply a combined approach of CMS and iLISI scoring to reveal that batch correction algorithms  
456 pose a risk to over-merge diverse cell types if not properly supervised, while data normalization offers a  
457 simple strategy for minimizing the influence of batch-specific, low expression gene transcripts to the sample.  
458 We recognize that while we identify the best strategy to minimize batch-effect in the PBMC samples tested,

159 the optimal strategy may vary by tissue or even by dataset. Rather than endorse a single approach to  
160 remove batch-effect, we offer a novel tool, CMS scoring, that, in combination with iLISI can assess cell  
161 mismatching and UMAP integration and aid in choosing the correct computational methods for any dataset.

## 462 **Materials and Methods**

### 463 **Sample preparation and single-cell encapsulation**

464 Peripheral venous blood was collected from healthy volunteer donors through Emory University's  
465 Children's Clinical and Translational Discovery Core. Peripheral Blood Mononuclear Cells (PBMCs) were  
466 isolated using the Direct Human PBMC Isolation Kit (StemCell Technologies) according to the  
467 manufacturer's protocol and washed/resuspended in custom RPMI-1640 deficient in biotin, L-glutamine,  
468 phenol red, riboflavin, and sodium bicarbonate (defRPMI), and containing 3% newborn calf serum and  
469 Benzonase. Cell number and viability were assessed using ViaStain™ Acridine Orange/Propidium Iodide  
470 (AOPI, Nexcelom) on a Cellometer K2 cell counter (Nexcelom), following manufacturer recommendations. A  
471 maximum of  $1 \times 10^6$  cells/donor were stained by oligo-barcoded antibodies (TotalSeq-A or TotalSeq-C;  
472 Biolegend, Expedeon) for 30 min on ice, followed by two washes in defRPMI + 0.04% BSA. Cells were  
473 resuspended at 1200-1500 cells/ul in defRPMI + 0.04% BSA, passed through a 20uM filter, and counted  
474 prior to loading onto a Chromium Controller (10X Genomics). For generating single-cell RNA-seq libraries,  
475 cells were loaded to target encapsulation of six thousand cells.

### 477 **Library generation and sequencing**

478 Single-cell RNA-seq gene expression and ADT libraries were generated following the  
479 manufacturer's instructions using Chromium Single Cell 3'Library & Gel Bead Kit v2, with ADT library  
480 generation according to (Nat Methods 14, 865–868 (2017) for PBMC samples 1-3 and Chromium Single  
481 Cell 5'Library & Gel Bead Kit v1 with feature barcoding (10X Genomics) for PBMC samples 4 and 5. Gene  
482 expression libraries were sequenced to an average depth of 84,098 reads per cell using the Novaseq 6000  
483 platform (Illumina). ADT libraries were sequenced to a target depth of one hundred reads per antibody, per  
484 cell, on the Next-seq platform (Illumina). A separate aliquot of cells for each donor was stained with a  
485 fluorescent antibody cocktail (Supplementary Table 3) for 30 minutes on ice, followed by washing with  
486 defRPMI/3%NBCS + Benzonase (Sigma). Cells were fixed for 30 minutes at RT with FACS lysis solution

487 (BD Biosciences), followed by a final wash and analysis on a BD LSRII or FACSymphony A5 cytometer.  
488 Data were analyzed with FlowJo V10. The gating strategy for excluding debris, doublets, and non-viable  
489 cells is shown in Supplementary Fig. 3.

490

### 491 **Gene expression (GEX) data processing**

492 Raw sequence data (FASTQ files) was processed in a Linux environment using CellRanger V3 (10X  
493 Genomics, version details in Supplementary Table 1) to generate a digital expression matrix. Specifically,  
494 splicing-aware aligner STAR was used for sequence alignment to GRCh38 (Ensembl 93). Viable cell  
495 barcodes were found automatically by CellRanger. Digital expression matrices were exported for further  
496 analyses. Further data analysis was performed in an R environment (Version 3.6.1, CRAN) using the Seurat  
497 toolkit (Version 3.2.2, Satija Lab) following previously published workflows<sup>22</sup>. Following Seurat standard  
498 recommendations, data were first filtered for quality using specific QC criteria (maximum mitochondrial  
499 content) to limit the analysis to cells with transcriptomes that were not apoptotic. Cell barcodes with  
500 mitochondrial transcripts (>5 standard deviations above the median level of mitochondrial transcripts) were  
501 suspected to be dying cells and excluded. On average, 99.3% of putative cells met QC criteria and were  
502 included in the analysis (range = 99.2 - 99.4).

503 From the five human PBMC donors (seven libraries), we included a total of 37,442 cells, with a  
504 range of 3,758-6,374 cells per donor and a median of 5,729 cells per sample. Genes were selected for  
505 differential expression across the sample using Seurat's highly variable gene selection tool,  
506 "FindVariableFeatures." A setting was chosen to select the 2,000 most variable features identified per  
507 sample. Principle Components Analysis (PCA) was used to reduce the dimensionality of the gene  
508 expression matrix. A singular value decomposition (SVD) PCA was performed on the subset of highly  
509 variable genes. To identify an appropriate number of PCs, we employed a z-scoring method. We run a  
510 complete PCA reduction and z-score the contribution of each PC to the total variance. PCs with  $z \geq 1$   
511 were considered significant and used further in the analysis. The SVD PCA returns the right singular values,

512 representing the embeddings of each cell in PC space, and left singular values, representing the loadings  
513 (weights) of each gene in the PC space. Cell embeddings (right singular values) were weighted by the  
514 variance of each PC.

### 516 **Antibody-derived tag (ADT) data processing**

517 ADT data was co-analyzed with GEX data as raw sequence data (FASTQ files) in a Linux  
518 environment using Cell Ranger V3 (10X Genomics, version details in Supplementary Table 1). ADT data  
519 was aligned directly to a feature reference file containing the sequence of each barcode mapped to the  
520 corresponding antibody. Digital expression matrices for ADT protein expression were exported for further  
521 analyses. ADT count matrices were normalized and denoised using the R package “dsb” version 0.1.0<sup>23</sup>.

### 523 **Data embedding and cell clustering**

524 For 2-dimensional visualization, Uniform Manifold Approximation and Projection (UMAP) reduction  
525 was performed on the PCA matrix (<https://github.com/lmcinnes/umap>). In parallel, independent of the  
526 UMAP coordinates, Louvain–Jaccard clustering was performed on the PC-space. This “bottom-up”  
527 clustering method employs a stochastic shared-nearest-neighbor (SNN) approach, in which cells are  
528 grouped according to their neighbors in PC space. The nearness of two cells is weighted by the Jaccard  
529 index or the degree of sharing between the lists of each cell’s nearest neighbors. The algorithm will build  
530 small groups of cells and attempt to iteratively merge them into clusters until the modularity is maximized.  
531 We found that a resolution of 0.8 was most proper for building biologically meaningful clusters.

### 533 **Cell-type identification and classification**

534 Following PCA (performed on the GEX matrix of highly variable genes), we generated clusters by  
535 Louvain–Jaccard clustering with a resolution of 0.8, as implemented by the Seurat function “FindClusters”.  
536 Using detection of lineage-specific ADT and GEX markers, we assigned each cluster to a single major

537 lineage (markers and representative data depicted in Supplementary Fig. 2). When indicated in the text,  
538 differentially expressed genes were determined using the likelihood-ratio test for single-cell gene  
539 expression, as implemented in the “bimod” method of the Seurat function “FindMarkers”<sup>10,20</sup>.

540

### 541 **Cell Misclassification Statistic**

542 To generate the Cell Misclassification Statistic (CMS) score, we first assign cell type labels to  
543 clusters in a merged, multi-sample dataset. This can be carried out either by following a gating strategy and  
544 assigning cell types to entire clusters which fall within each gate or by transferring cluster labels from a  
545 previously gated dataset containing shared cells. The transferred labels can be used to aid cell-type  
546 identification but should always be confirmed by marker expression following the overall gating strategy.  
547 After cell types have been recorded for the merged samples (target dataset), we match a vector of cell  
548 identities from the same sample, processed by a different workflow (reference dataset). We then compare  
549 the target cell IDs to a vector of the reference cell type IDs. The CMS score generated is the sum of  
550 matching values (total number of cell type ID matches) between the two cell-typing replicates, divided by the  
551 total number of cells. We then invert the score by subtracting it from one so that the result is a measure of  
552 the fraction of cells that change cell type ID between data analysis workflows. CMS can be directly  
553 interpreted as the percentage (expressed as a decimal) of cells which have been misclassified by one of the  
554 workflows. Where reported, the CMS is the mean score of all samples present.

555

### 556 **Modified Local Inverse Simpson’s Index (LISI):**

557 Our modified LISI score, the integration LISI or iLISI, is an effective indicator of sample mixing in the  
558 UMAP. A LISI score represents, for a given cell, the number of neighboring cells which need to be sampled  
559 before the same identity class is sampled (in this case, sample ID). In other words, LISI effectively counts  
560 how many identity classes are represented in the local neighborhood of each cell<sup>13</sup>. If we merge three  
561 samples, then the maximum LISI score will be close to three, and the minimum close to one. However, the  
562 actual maximum score may differ by UMAP. To account for differing numbers of samples and to place LISI



563 on a similar scale as CMS, we first take the median LISI score for a merged set of samples using the r  
564 package “LISI”<sup>13</sup> with sample ID used as the cell label. We subtract the minimum LISI score (one) from the  
565 median LISI and divide the result by the maximum LISI (the number of samples). The result is an iLISI score  
566 on a scale of zero to one, where a score of one is ideal integration and zero is a perfectly segregated  
567 sample. We then inverted these scores by subtracting them from 1, such that the best integrated UMAP will  
568 achieve a score approaching 0. This was done to align the values with CMS so that higher scores mean  
569 better integration across both measurements.  $iLISI = 1 - (LISI - 1) / (\text{maximum score} - 1)$ . Where reported,  
570 the iLISI is the mean score of all samples present.

571

#### 572 **Data availability**

573 Gene expression and Antibody Derived Tag matrices have been deposited on the Gene Expression  
574 Omnibus (GEO).

575

#### 576 **Code availability**

577 Full data analysis workflow and R scripts are made available at [github.com/Ghosn-Lab/BBabcock](https://github.com/Ghosn-Lab/BBabcock)

578

579

## 580 References

- 581 1 Yu, P. & Lin, W. Single-cell Transcriptome Study as Big Data. *Genomics Proteomics Bioinformatics* **14**,  
582 21-30, doi:10.1016/j.gpb.2016.01.005 (2016).
- 583 2 Luecken, M. D. & Theis, F. J. Current best practices in single-cell RNA-seq analysis: a tutorial. *Mol*  
584 *Syst Biol* **15**, e8746, doi:10.15252/msb.20188746 (2019).
- 585 3 Aliverti, E. *et al.* Projected t-SNE for batch correction. *Bioinformatics* **36**, 3522-3527,  
586 doi:10.1093/bioinformatics/btaa189 (2020).
- 587 4 Chen, W. *et al.* A multicenter study benchmarking single-cell RNA sequencing technologies using  
588 reference samples. *Nat Biotechnol*, doi:10.1038/s41587-020-00748-9 (2020).
- 589 5 Tran, H. T. N. *et al.* A benchmark of batch-effect correction methods for single-cell RNA sequencing  
590 data. *Genome Biol* **21**, 12, doi:10.1186/s13059-019-1850-9 (2020).
- 591 6 Hafemeister, C. & Satija, R. Normalization and variance stabilization of single-cell RNA-seq data  
592 using regularized negative binomial regression. *Genome Biol* **20**, 296, doi:10.1186/s13059-019-  
593 1874-1 (2019).
- 594 7 Hie, B., Bryson, B. & Berger, B. Efficient integration of heterogeneous single-cell transcriptomes  
595 using Scanorama. *Nat Biotechnol* **37**, 685-691, doi:10.1038/s41587-019-0113-3 (2019).
- 596 8 Korsunsky, I. *et al.* Fast, sensitive and accurate integration of single-cell data with Harmony. *Nat*  
597 *Methods* **16**, 1289-1296, doi:10.1038/s41592-019-0619-0 (2019).
- 598 9 Stein-O'Brien, G. L. *et al.* Decomposing Cell Identity for Transfer Learning across Cellular  
599 Measurements, Platforms, Tissues, and Species. *Cell Syst* **8**, 395-411 e398,  
600 doi:10.1016/j.cels.2019.04.004 (2019).
- 601 10 Stuart, T. *et al.* Comprehensive Integration of Single-Cell Data. *Cell* **177**, 1888-1902 e1821,  
602 doi:10.1016/j.cell.2019.05.031 (2019).
- 603 11 Welch, J. D. *et al.* Single-Cell Multi-omic Integration Compares and Contrasts Features of Brain Cell  
604 Identity. *Cell* **177**, 1873-1887 e1817, doi:10.1016/j.cell.2019.05.006 (2019).
- 605 12 Xu, C. *et al.* Comprehensive multi-omics single-cell data integration reveals greater heterogeneity in  
606 the human immune system. *bioRxiv* (2021).
- 607 13 Korsunsky, I. *LISI*, <<https://github.com/immunogenomics/LISI>> (2019).
- 608 14 Korsunsky, I. *How to use Harmony with Seurat V3*,  
609 <<https://github.com/immunogenomics/harmony/blob/master/docs/SeuratV3>> (2019).
- 610 15 Welch, J. D. *LIGER*, <<https://github.com/welch-lab/liger>> (2021).
- 611 16 Butler, A. *Integrating Seurat objects using LIGER*, <[https://github.com/satijalab/seurat-](https://github.com/satijalab/seurat-wrappers/blob/master/docs/liger.md)  
612 [wrappers/blob/master/docs/liger.md](https://github.com/satijalab/seurat-wrappers/blob/master/docs/liger.md)> (2021).
- 613 17 Satija, R. *Integration and Label Transfer: SCTransform Vignette*,  
614 <<https://satijalab.org/seurat/archive/v3.0/integration.html>> (2019).
- 615 18 Lytal, N., Ran, D. & An, L. Normalization Methods on Single-Cell RNA-seq Data: An Empirical Survey.  
616 *Front Genet* **11**, 41, doi:10.3389/fgene.2020.00041 (2020).
- 617 19 Hou, W., Ji, Z., Ji, H. & Hicks, S. C. A systematic evaluation of single-cell RNA-sequencing imputation  
618 methods. *Genome Biol* **21**, 218, doi:10.1186/s13059-020-02132-x (2020).
- 619 20 McDavid, A. *et al.* Data exploration, quality control and testing in single-cell qPCR-based gene  
620 expression experiments. *Bioinformatics* **29**, 461-467, doi:10.1093/bioinformatics/bts714 (2013).

- 521 21 Rousseeuw, P. J. Silhouettes: A graphical aid to the interpretation and validation of cluster analysis.  
522 *Journal of Computational and Applied Mathematics* **20**, 53-65, doi:10.1016/0377-0427(87)90125-7  
523 (1987).
- 524 22 Ocasio, J. *et al.* scRNA-seq in medulloblastoma shows cellular heterogeneity and lineage expansion  
525 support resistance to SHH inhibitor therapy. *Nat Commun* **10**, 5829, doi:10.1038/s41467-019-  
526 13657-6 (2019).
- 527 23 Mulè, M. P., Martins, A. J. & Tsang, J. S. Normalizing and denoising protein expression data from  
528 droplet-based single cell profiling. *bioRxiv*, doi:<https://doi.org/10.1101/2020.02.24.963603> (2021).  
529

530

531 **Acknowledgments**

532 This study was supported in part by Georgia Clinical and Translational Science Alliance (CTSA)  
533 through the National Center for Advancing Translational Sciences of the National Institutes of Health under  
534 Award number NIH UL1TR002378; Pediatric Research Alliance, Center for Transplantation, and Immune-  
535 Mediated Disorders (Children's Healthcare of Atlanta); and Lowance Center for Human Immunology. We  
536 thank Sachin Kumar (Emory University) for helpful conversations. We thank Emory University's Children's  
537 Clinical and Translational Discovery Core (CCTDC) for providing peripheral blood samples from healthy  
538 donors. Flow cytometry data were collected at the Emory's Pediatrics/Winship Flow Cytometry Core  
539 (access supported in part by Children's Healthcare of Atlanta). Single-cell libraries were sequenced at the  
540 Emory Integrated Genomics Core (EIGC), which is subsidized by the Emory University School of Medicine  
541 and is one of the Emory Integrated Core Facilities, and at PerkinElmer Genomics Inc.

542

543 **Author Contributions**

544 EEBG and BRB conceived the study. BRB performed all computational analyses and developed  
545 the CMS scoring method under the supervision of EEBG. BRB, EEBG and AK wrote, reviewed and  
546 edited the manuscript. AK performed all tissue processing and flow cytometry, and generated the  
547 scRNA-seq libraries. JY performed all data pre-processing workflows, including GEX and ADT  
548 alignment. MLW performed flow cytometry analyses. All authors read and approved the final  
549 manuscript.

550

551 **Competing Interest**

552 The authors declare no competing interests.

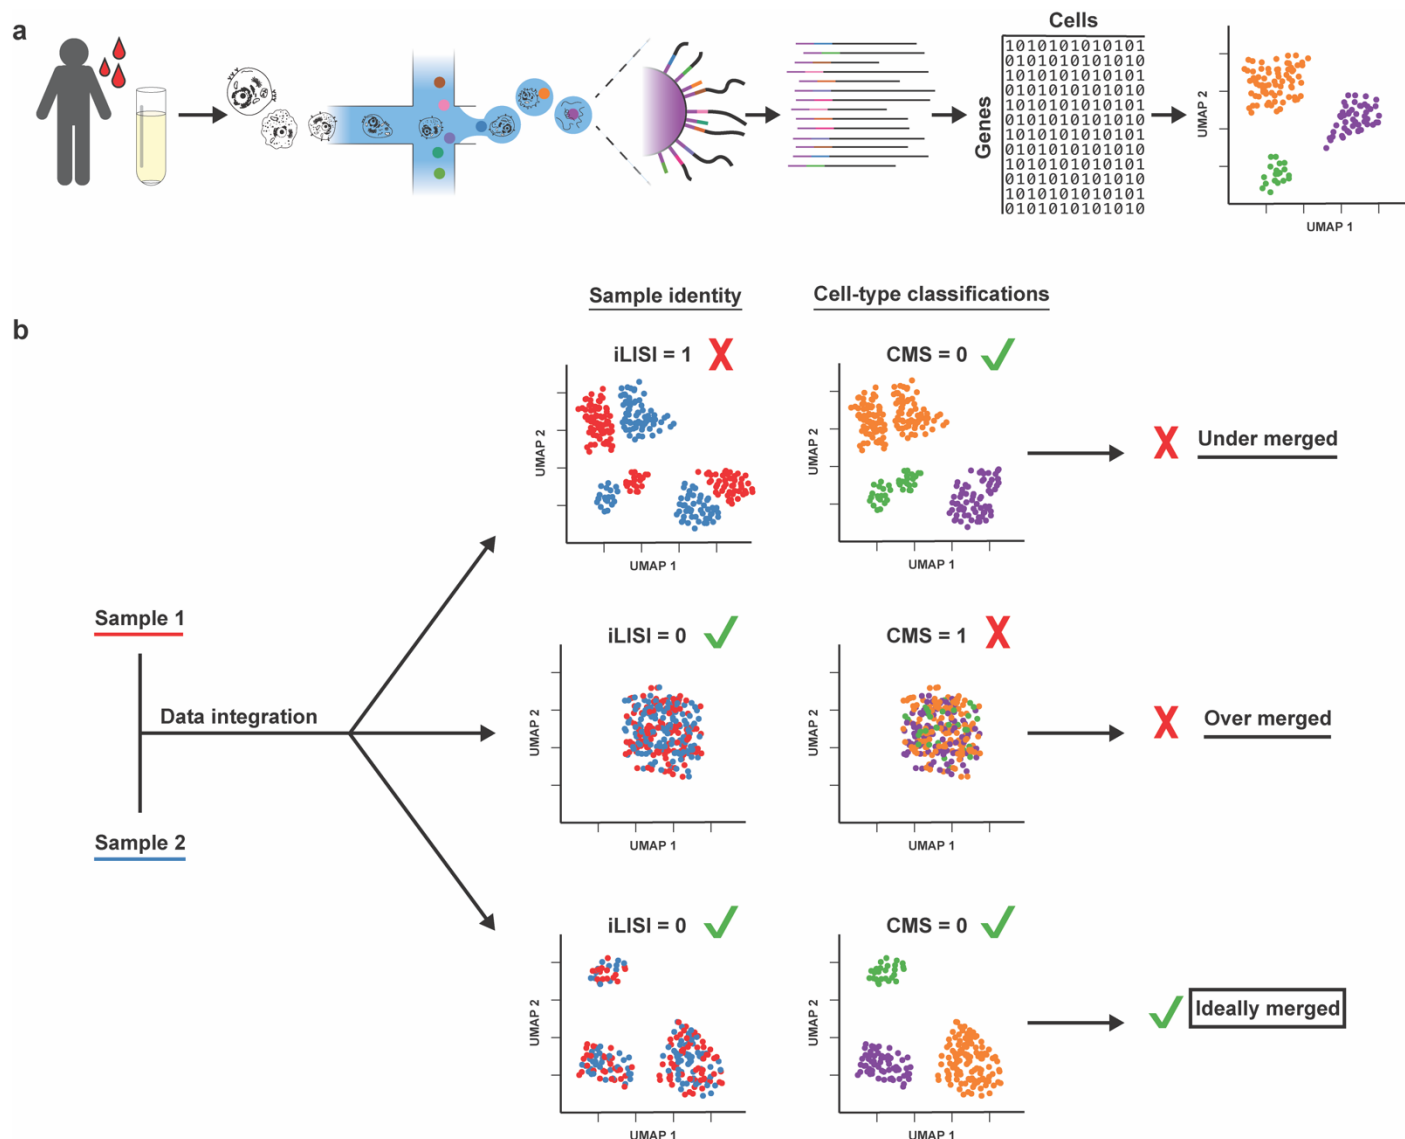

**Fig. 1: Schematic of analysis workflow to quantify data integration and batch-correction fidelity.**

**a**, Tissue (blood) is extracted from the sample donor, washed, and PBMCs isolated. PBMCs are encapsulated in microfluidic droplets, along with a barcode-bearing bead. Cells are lysed in the droplets, and mRNA is captured on the bead, resulting in a barcoded cDNA library. Libraries are sequenced to generate a GEX matrix (cells x genes) containing transcript counts. Cells are analyzed and plotted by UMAP and clustered according to transcript similarity, after which cell types are classified. **b**, Cell Misclassification Statistic (CMS) and modified integration LISI (iLISI) metrics provide measures of cell-type fidelity and UMAP mixing, respectively. CMS and iLISI can assist in optimizing a workflow for the best-mixed UMAP while preserving the cell-type-specific signals in the data.

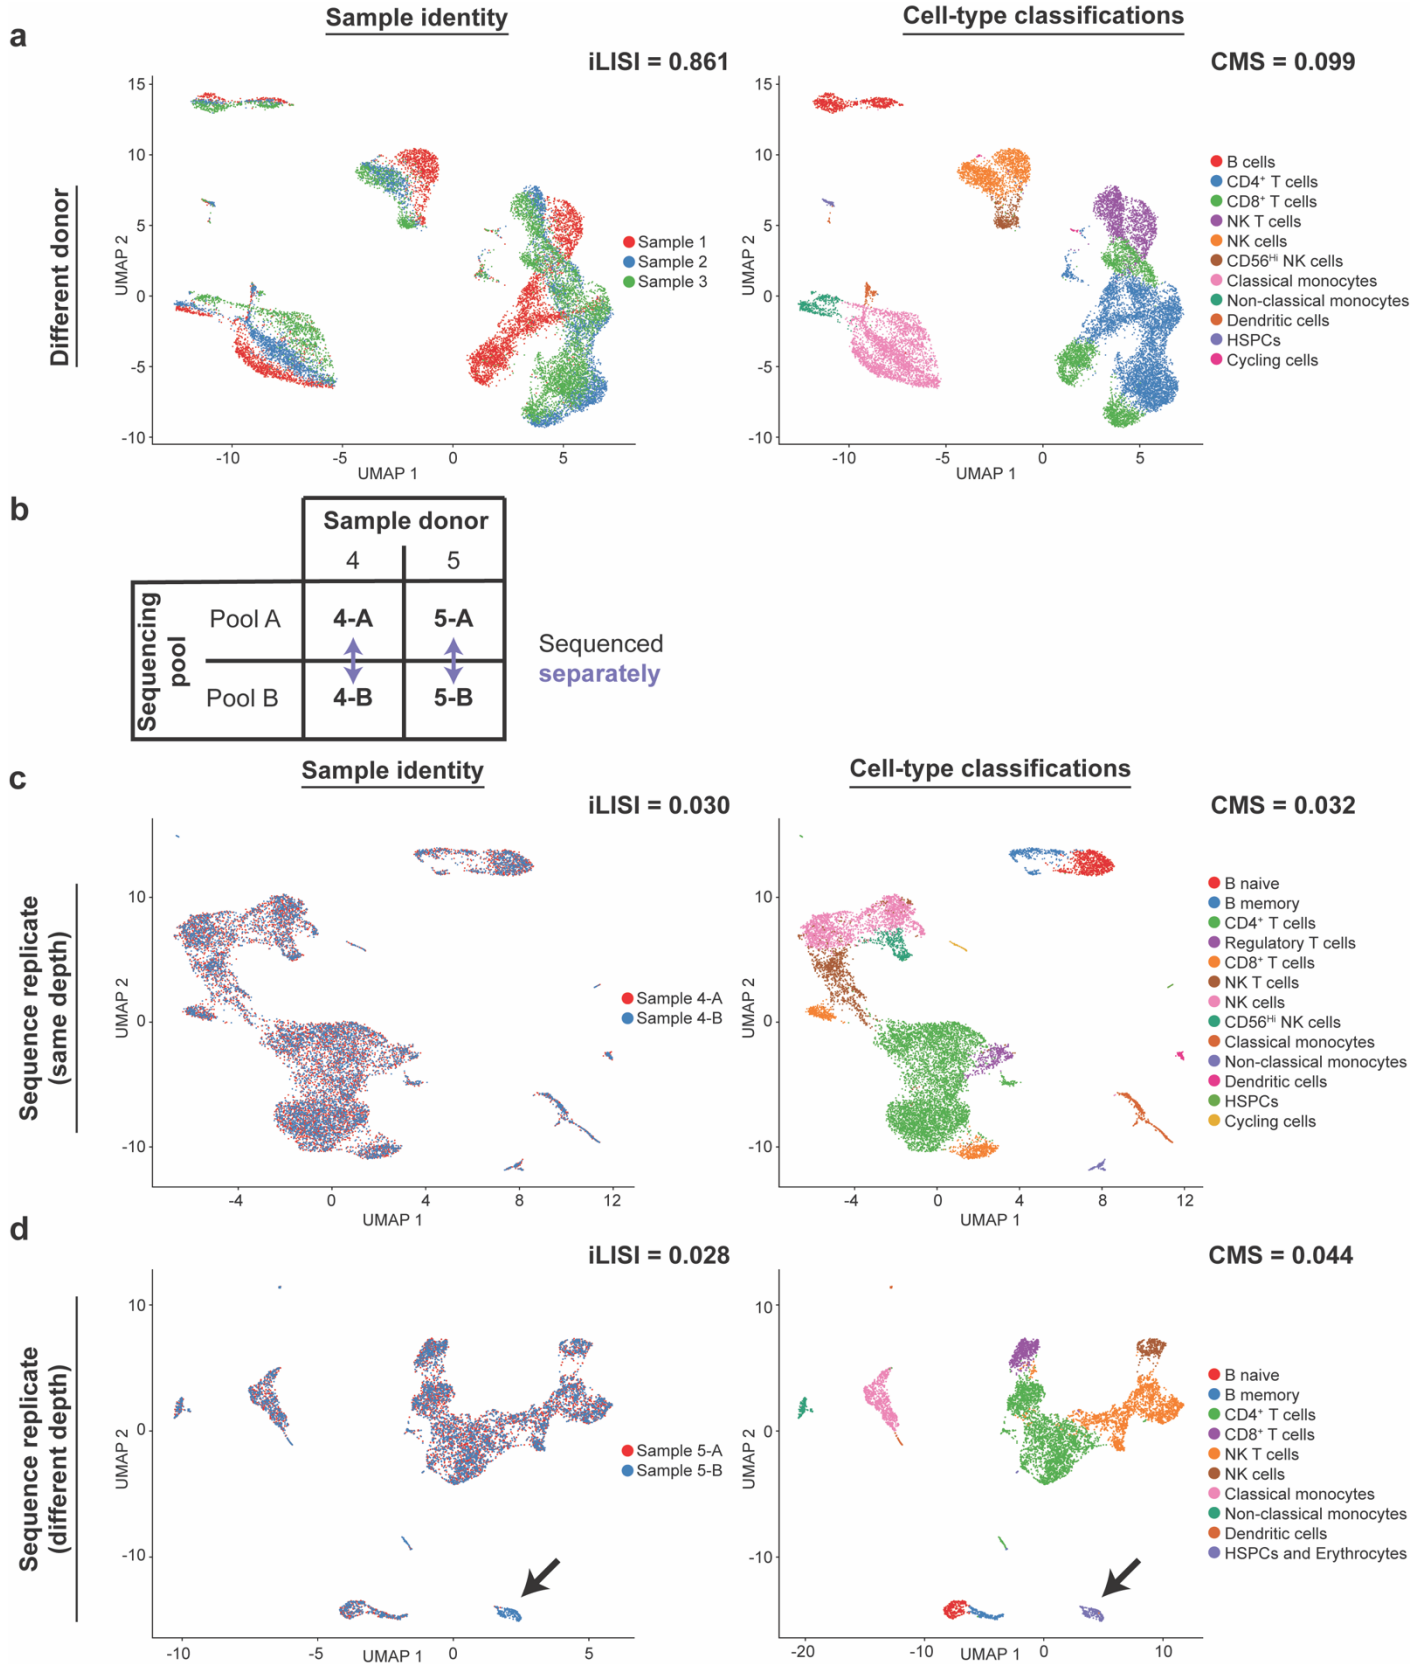

**Fig. 2: Batch effects are generated by sample donor and sequencing depth, but not sequencing replicates alone.** **a**, PBMCs from three different donors, processed and sequenced simultaneously and mixed for co-analysis, produce a favorable cell-type classification fidelity (CMS = 0.099) but an unfavorable (i.e., poorly mixed) UMAP (iLISI = 0.861). **b**, A schematic of sample sequencing strategy. Libraries from two donors (samples 4 and 5) were sequenced twice. **c**, A library generated from a single PBMC sample, divided and sequenced twice to similar read depth (average reads per cell), produces a well-integrated UMAP and high-fidelity cell classifications (iLISI = 0.030, CMS = 0.032). **d**, A library generated from a single PBMC sample, divided and sequenced twice with a three-fold difference in read depth produces favorable UMAP and cell-type fidelity metrics (iLISI = 0.028, CMS = 0.044). However, there are local sample-specific UMAP islands (black arrow) and misclassified cell types that reveal sequencing-depth-specific batch effects.

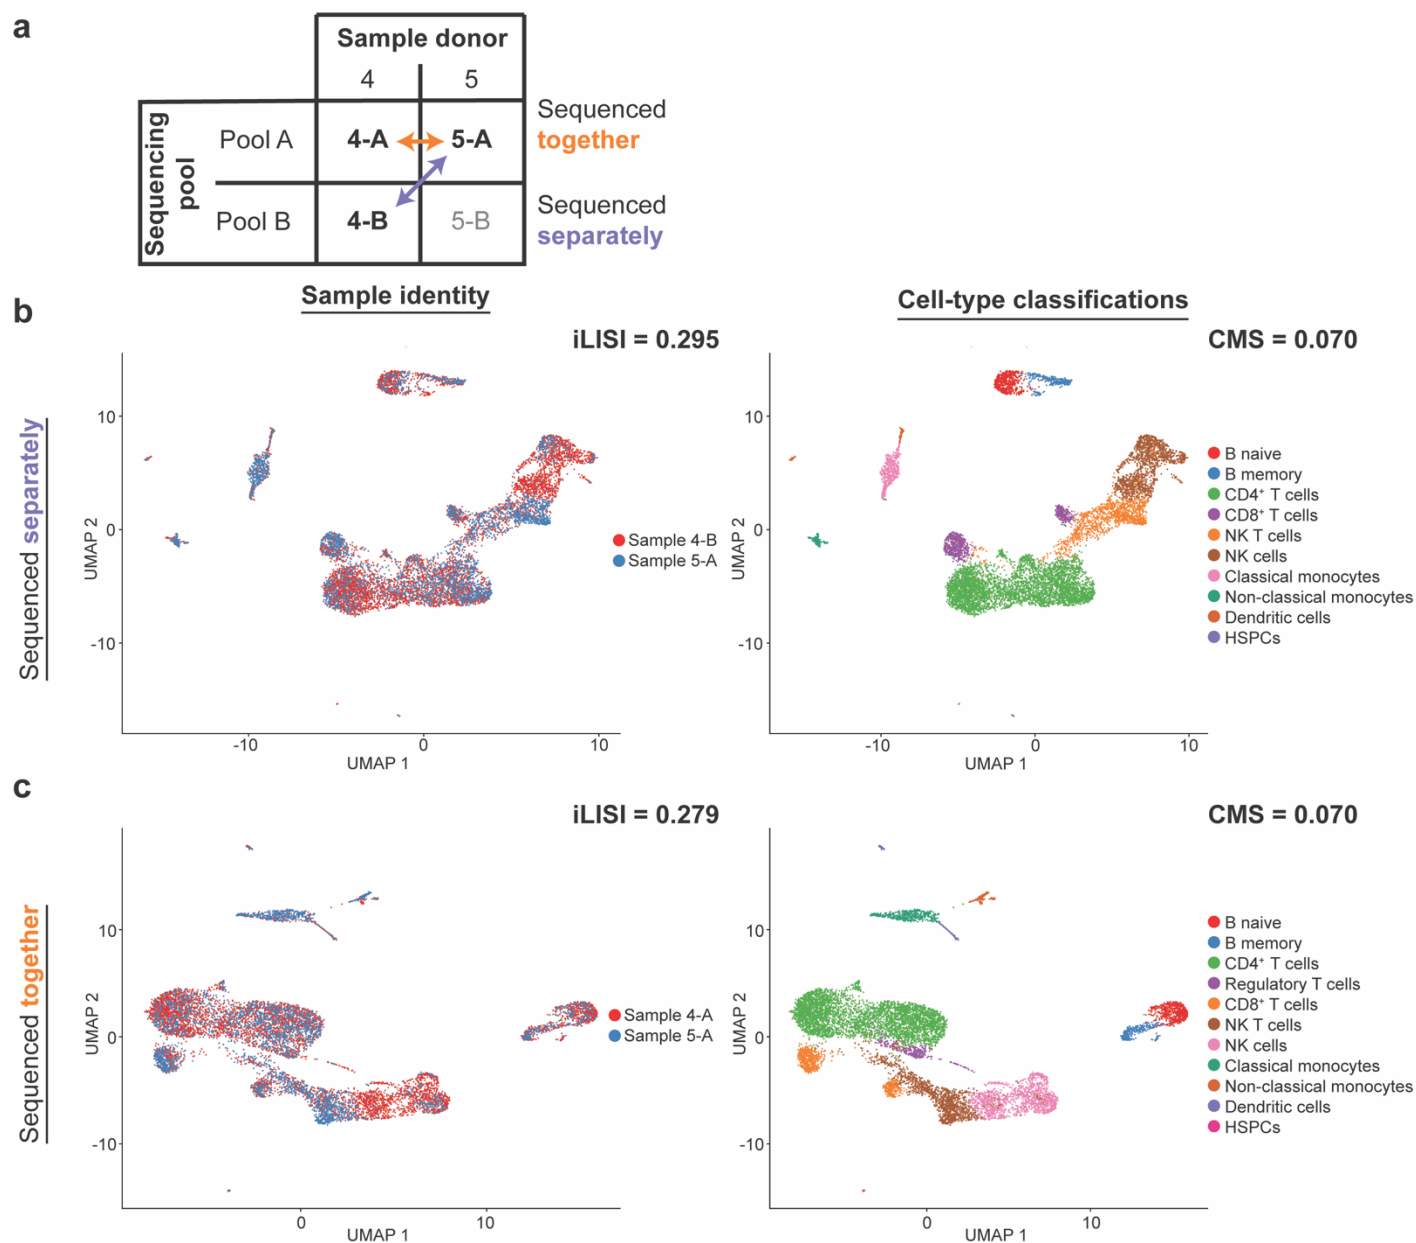

**Fig. 3: Pooling samples for sequencing does not appreciably improve the measured batch effect. a,** A schematic of pooling and comparison strategy between samples 4 and 5, sequenced across two independent pools (-A and -B). The same sample (5-A) was co-analyzed with either a sample from the same sequencing pool (4-A) or a different pool (4-B). **b,** Analysis of two PBMC samples from different sequencing pools results in a poorly mixed UMAP and the misclassification of 7% of cells (iLISI = 0.295, CMS = 0.070). **c,** Pooling libraries to sequence PBMC samples in a single pool, followed by mixing data for co-analysis, does not improve batch effects and, similarly, results in a poorly mixed UMAP and an equivalent 7% cell misclassification rate (iLISI = 0.279, CMS = 0.070).



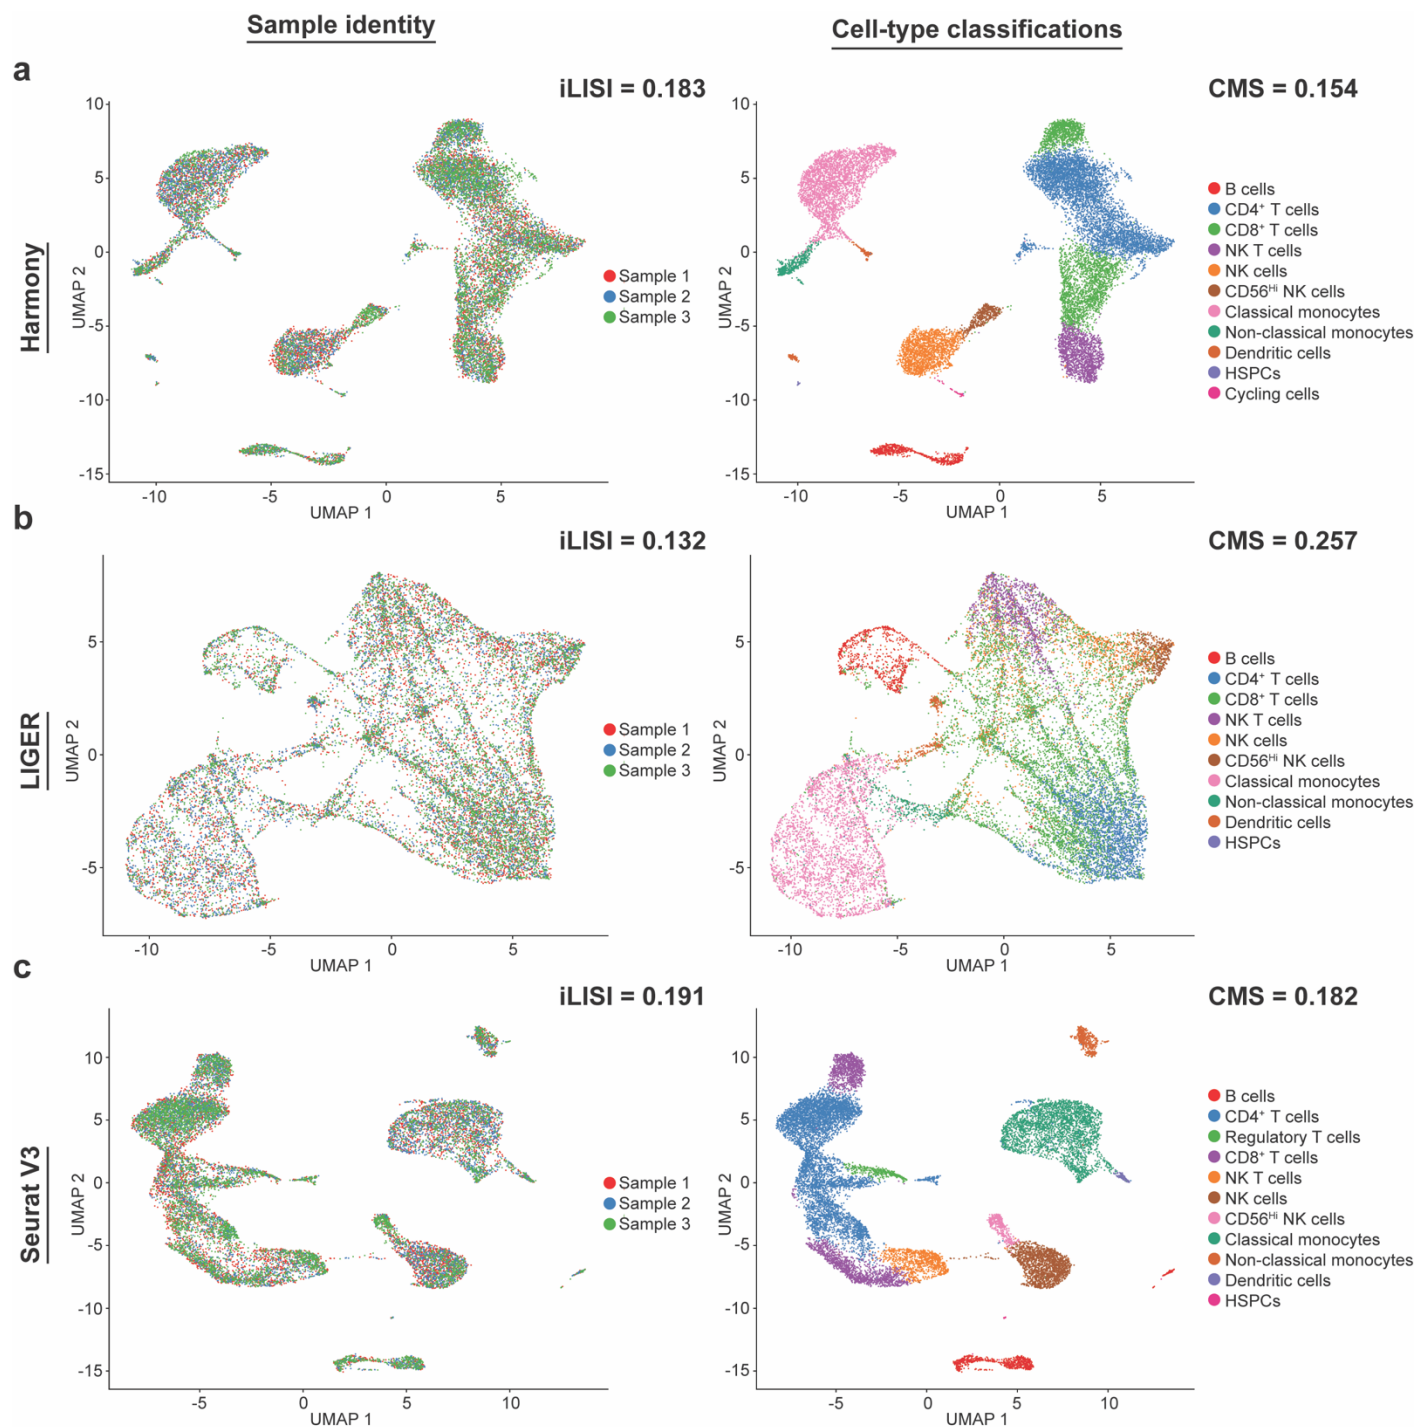

**Fig. 4: Common batch-effect correction methods imperfectly resolve batch effect.** **a**, Harmony correction merges samples to produce an integrated UMAP, but at 15.4% loss in cell-type classification fidelity (iLISI = 0.183, CMS = 0.154). **b**, LIGER correction produces an integrated UMAP, but at a 25.7% loss in cell-type classification fidelity (iLISI = 0.132, CMS = 0.257). **c**, Seurat V3 correction results in an integrated UMAP but at a cost of an 18.2% loss in cell-type classification fidelity (iLISI = 0.191, CMS = 0.182).

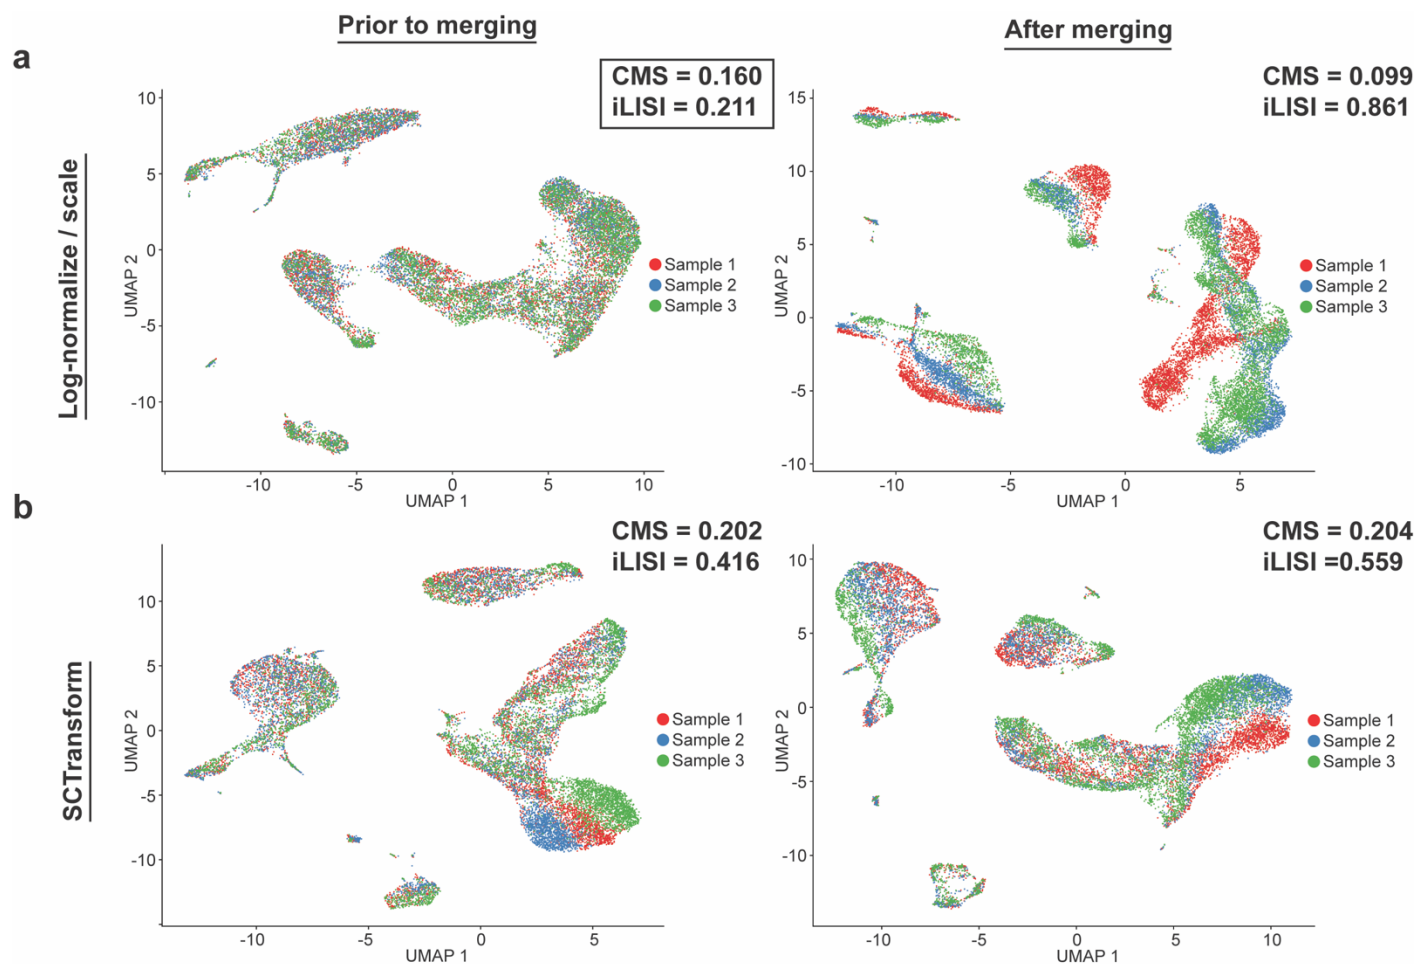

**Fig. 5: Data normalization and merging strategies differentially impact the measured batch effect. a,** UMAPs, colored by sample, when the same normalization methods (log-normalization and data scaling) are performed on each sample either prior to sample merging (i.e., normalized separately) or after sample merging (normalized together). **b,** UMAPs, colored by sample, when the SCTransform normalization method is performed before or after sample merging. For this data set, log-normalization/scaling performed on each sample separately, prior to sample merging, generated the best combination of both integration scores, CMS and iLISI (panel a, left).

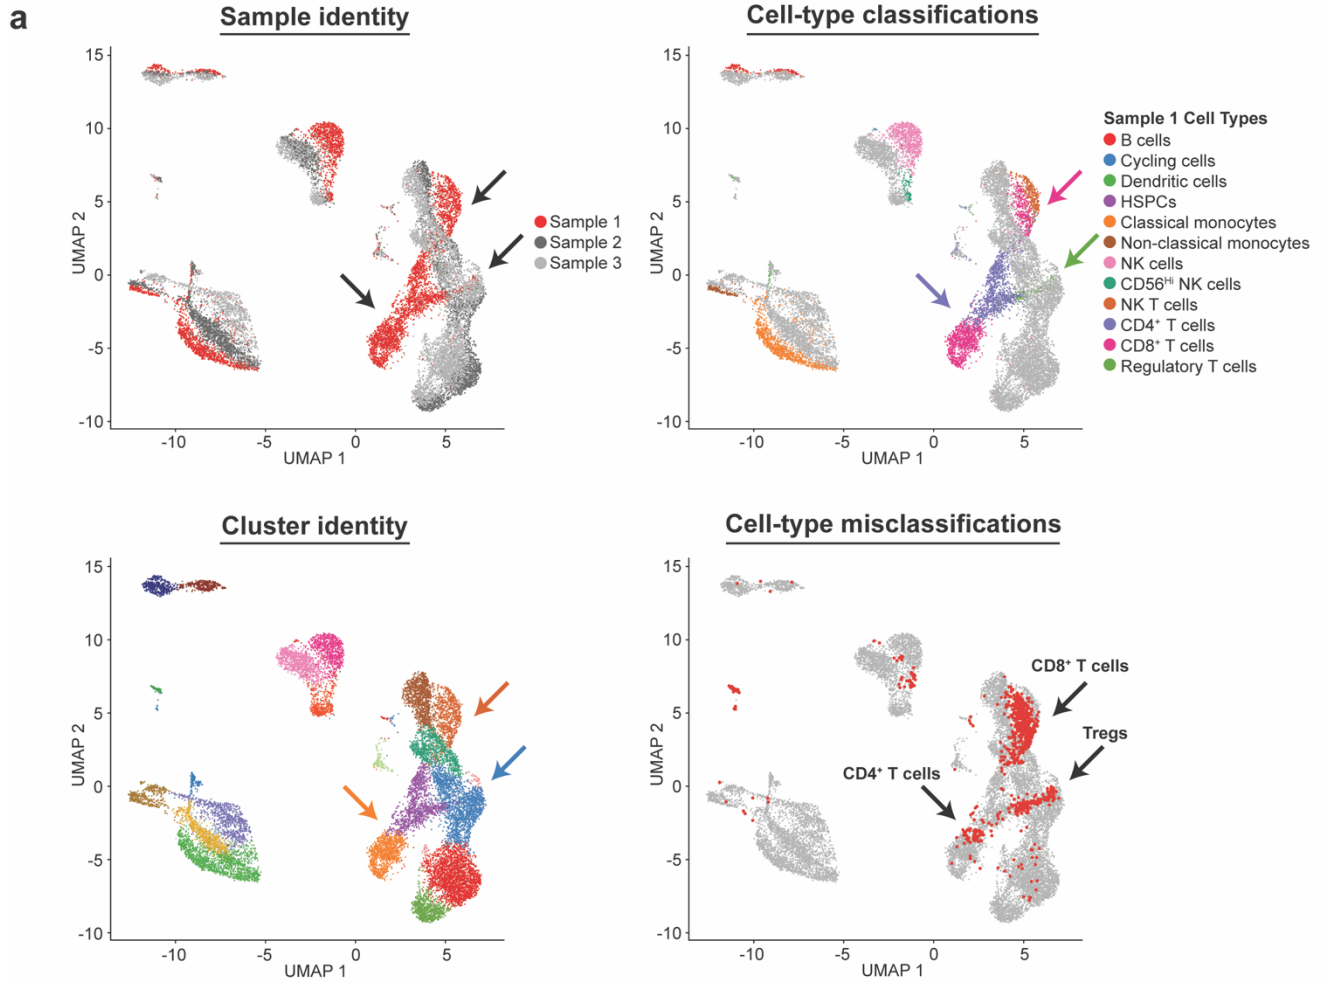

**b**

| Gene                             | RPS26 | RPS4Y1    | XIST  | RPS4X  | EIF1AY | SLC4A10 | SRGN  | MX1      | HLA-DQA2 | CTSA    | FAM118A | RUNX3  | NOSIP |
|----------------------------------|-------|-----------|-------|--------|--------|---------|-------|----------|----------|---------|---------|--------|-------|
| Fraction of cells expressing     | 90.2% | 27.5%     | 36.1% | 98.1%  | 6.3%   | 1.2%    | 64.1% | 13.8%    | 7.2%     | 13.2%   | 15.8%   | 23.4%  | 49.4% |
| Median count (of positive cells) | 8     | 3         | 1     | 18     | 1      | 1       | 2     | 1        | 1        | 1       | 1       | 1      | 2     |
| Gene                             | IFI44 | LINC00685 | SUB1  | PYHIN1 | CEP78  | PLP2    | IDH2  | MTRNR2L8 | SIT1     | JAKMIP1 | LY6E    | PTRHD1 | H1FX  |
| Fraction of eells expressing     | 9.5%  | 9.6%      | 70.8% | 18.3%  | 9.6%   | 36.1%   | 20.8% | 13.8%    | 17.4%    | 3.0%    | 59.6%   | 16.5%  | 25.9% |
| Median count (of positive cells) | 1     | 1         | 2     | 1      | 1      | 1       | 1     | 1        | 1        | 1       | 2       | 1      | 1     |

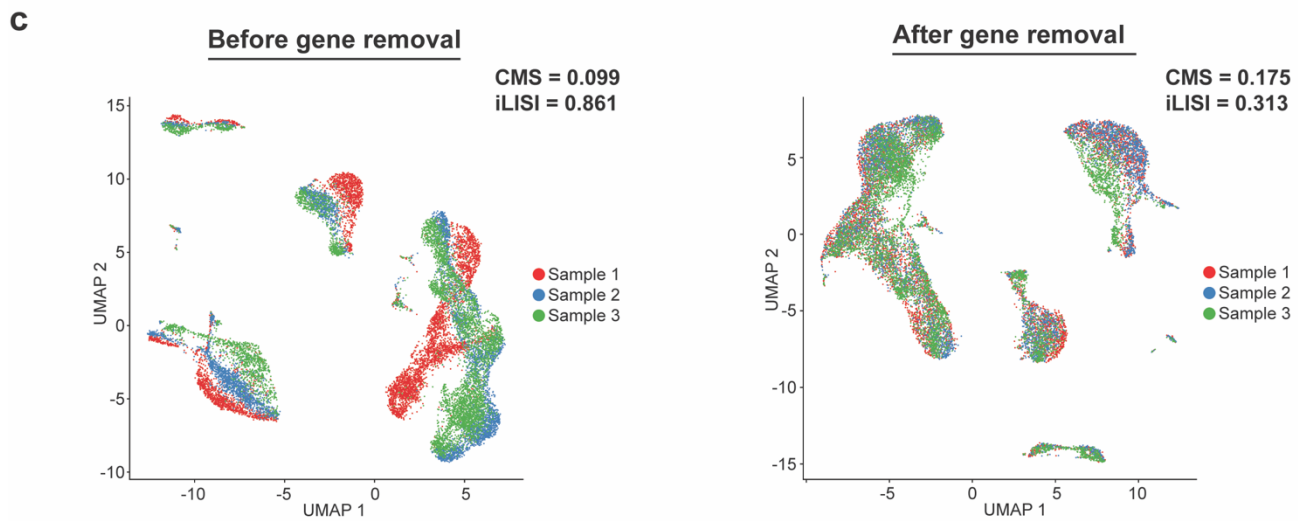

**Fig. 6: Low expression levels of highly-variable genes can play a role in batch effect, which can be amplified by the data normalization and merging strategies.** **a**, Misclassified cells are not distributed at random, and specific analysis of PBMC sample 1 reveals a loss of cell-type identity resulting from the over-merging of T cell subsets into clusters containing a majority of a different subset (misclassified T cells highlighted by arrows and red points). **b**, Selected genes identified as differentially expressed between the incorrectly classified CD8<sup>+</sup> T-cells of sample 1, marked by an arrow in (a), compared to the correctly classified CD8<sup>+</sup> T-cell cluster. Genes were restricted to those contained within the HVGs of sample 1, but not the HVGs of samples 2 or 3. Note that genes showing low expression levels (low median count) and broad expression (higher fraction of cells) are susceptible to gene dropout. **c**, Removal of selected genes (b) lessens but does not completely remove the batch effect from the sample (iLISI changes from 0.861 to 0.313, CMS changes from 0.099 to 0.175).

## "Single Cell RNA" Pubmed Results by Year, 1999-2020

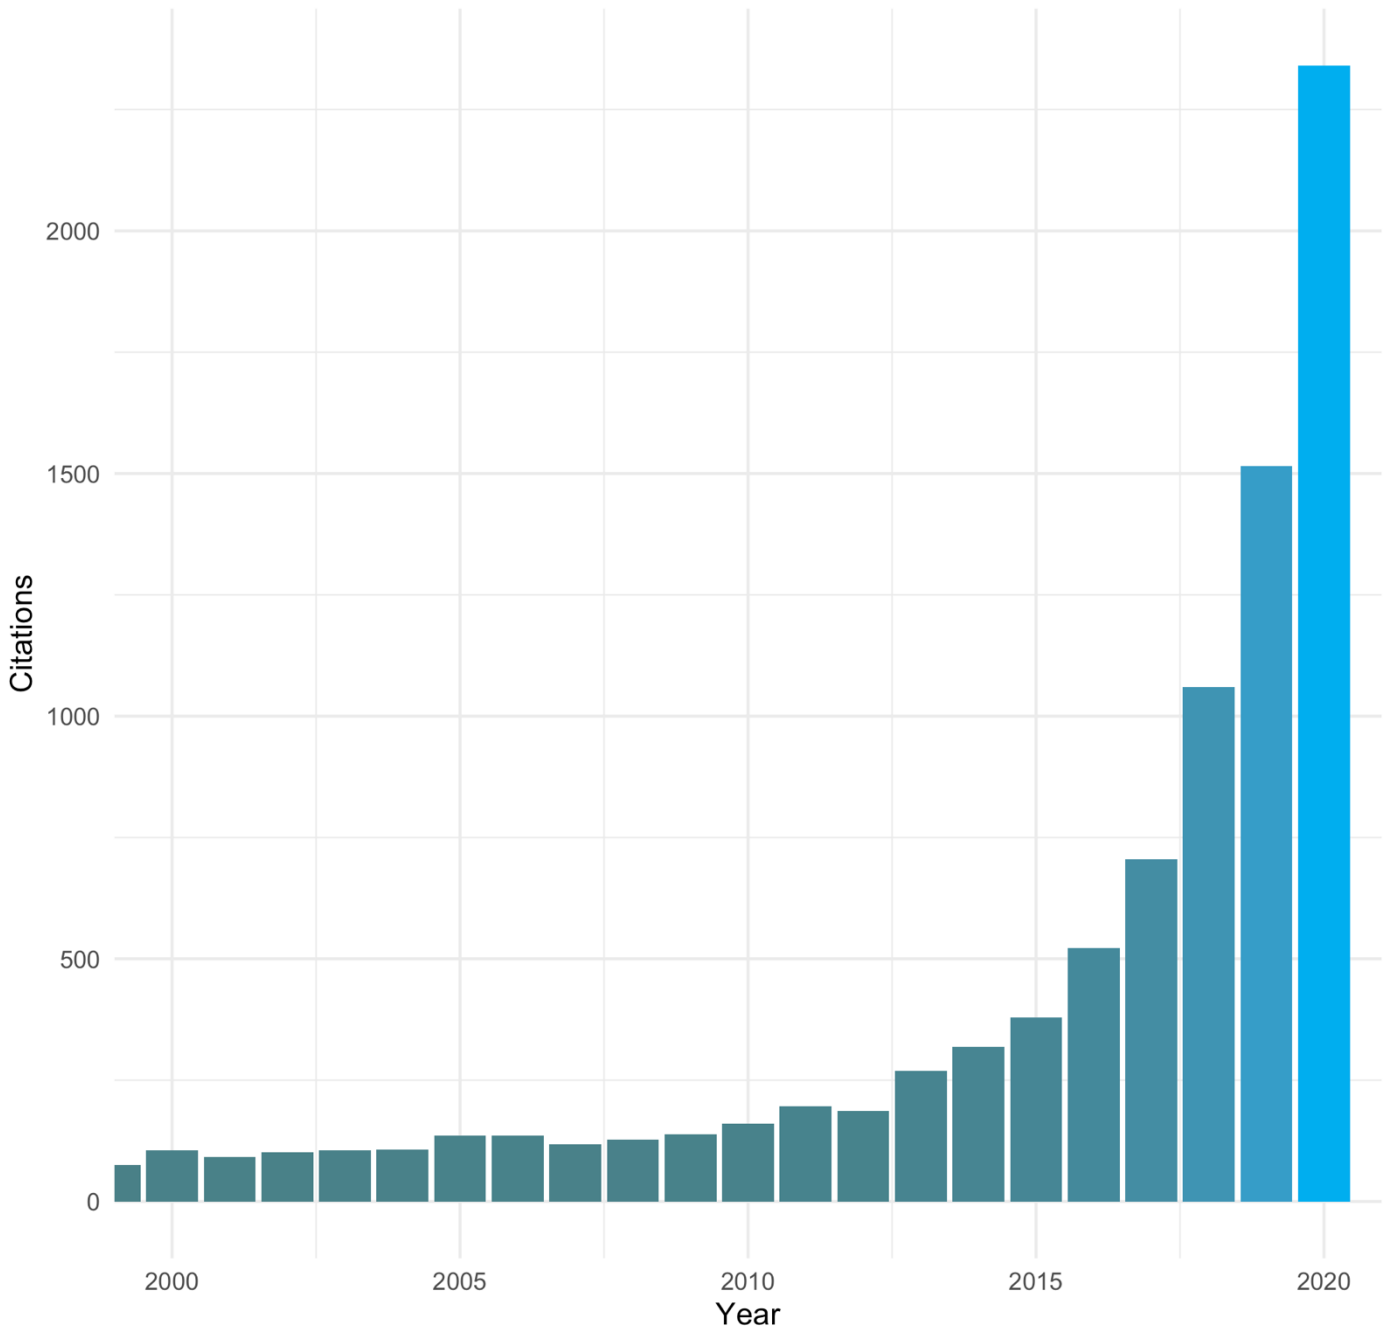

**Supplementary Figure 1. PubMed results for “Single Cell RNA” by year.** Increasing trend of publications citing single-cell RNA-seq data in recent decades.

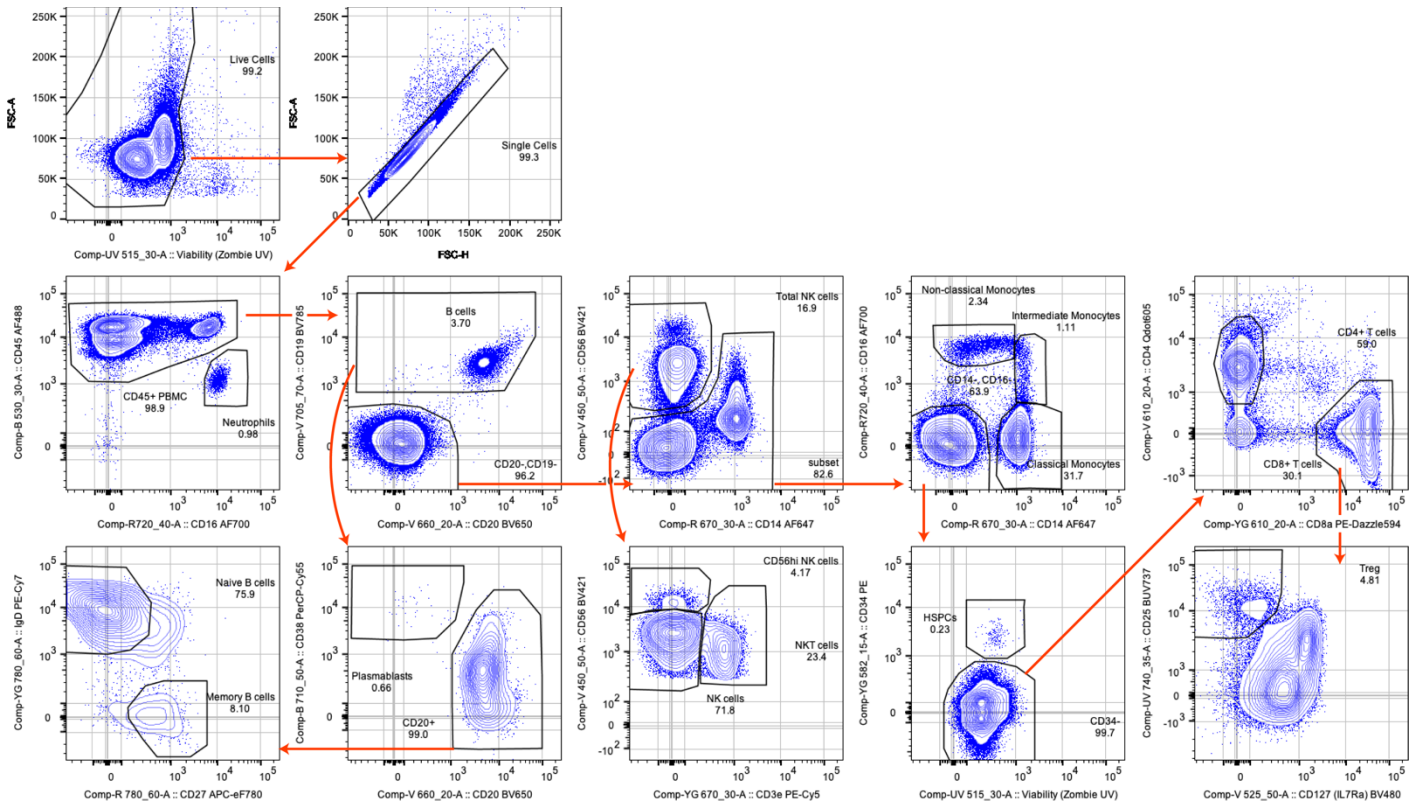

**Supplementary Figure 2. High-dimensional flow cytometry gating strategy to identify major immune lineages in the PBMC samples.** Representative gating strategy generated from sample 3, showing markers and gates used to identify major immune cell lineages using an 18-parameter flow cytometry panel.



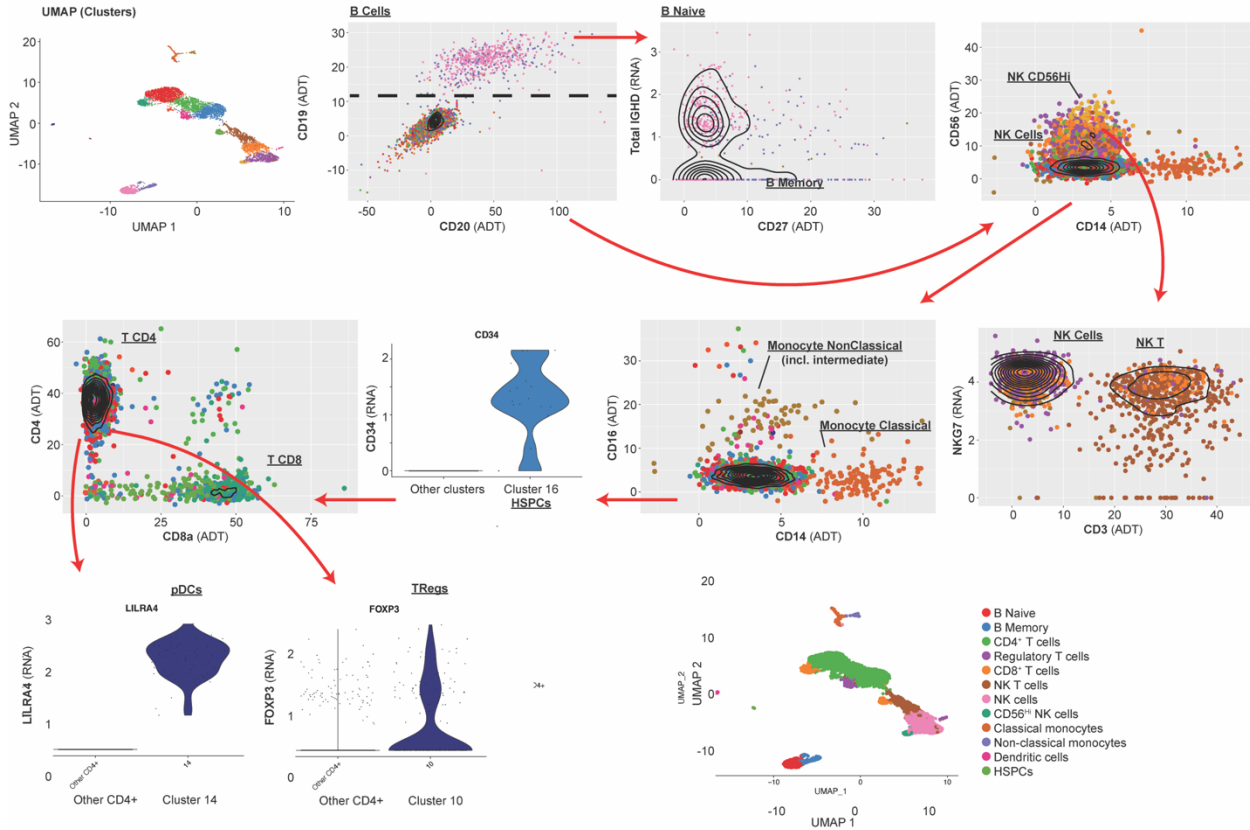

**Supplementary Figure 3. Gating strategy to identify major immune lineages using multi-omics single-cell sequencing data.** Representative gating strategy generated from sample 4-A, showing markers and gates used to assign entire clusters to major immune cell lineages based on gene expression (GEX matrix) and cell-surface proteins (ADT matrix).

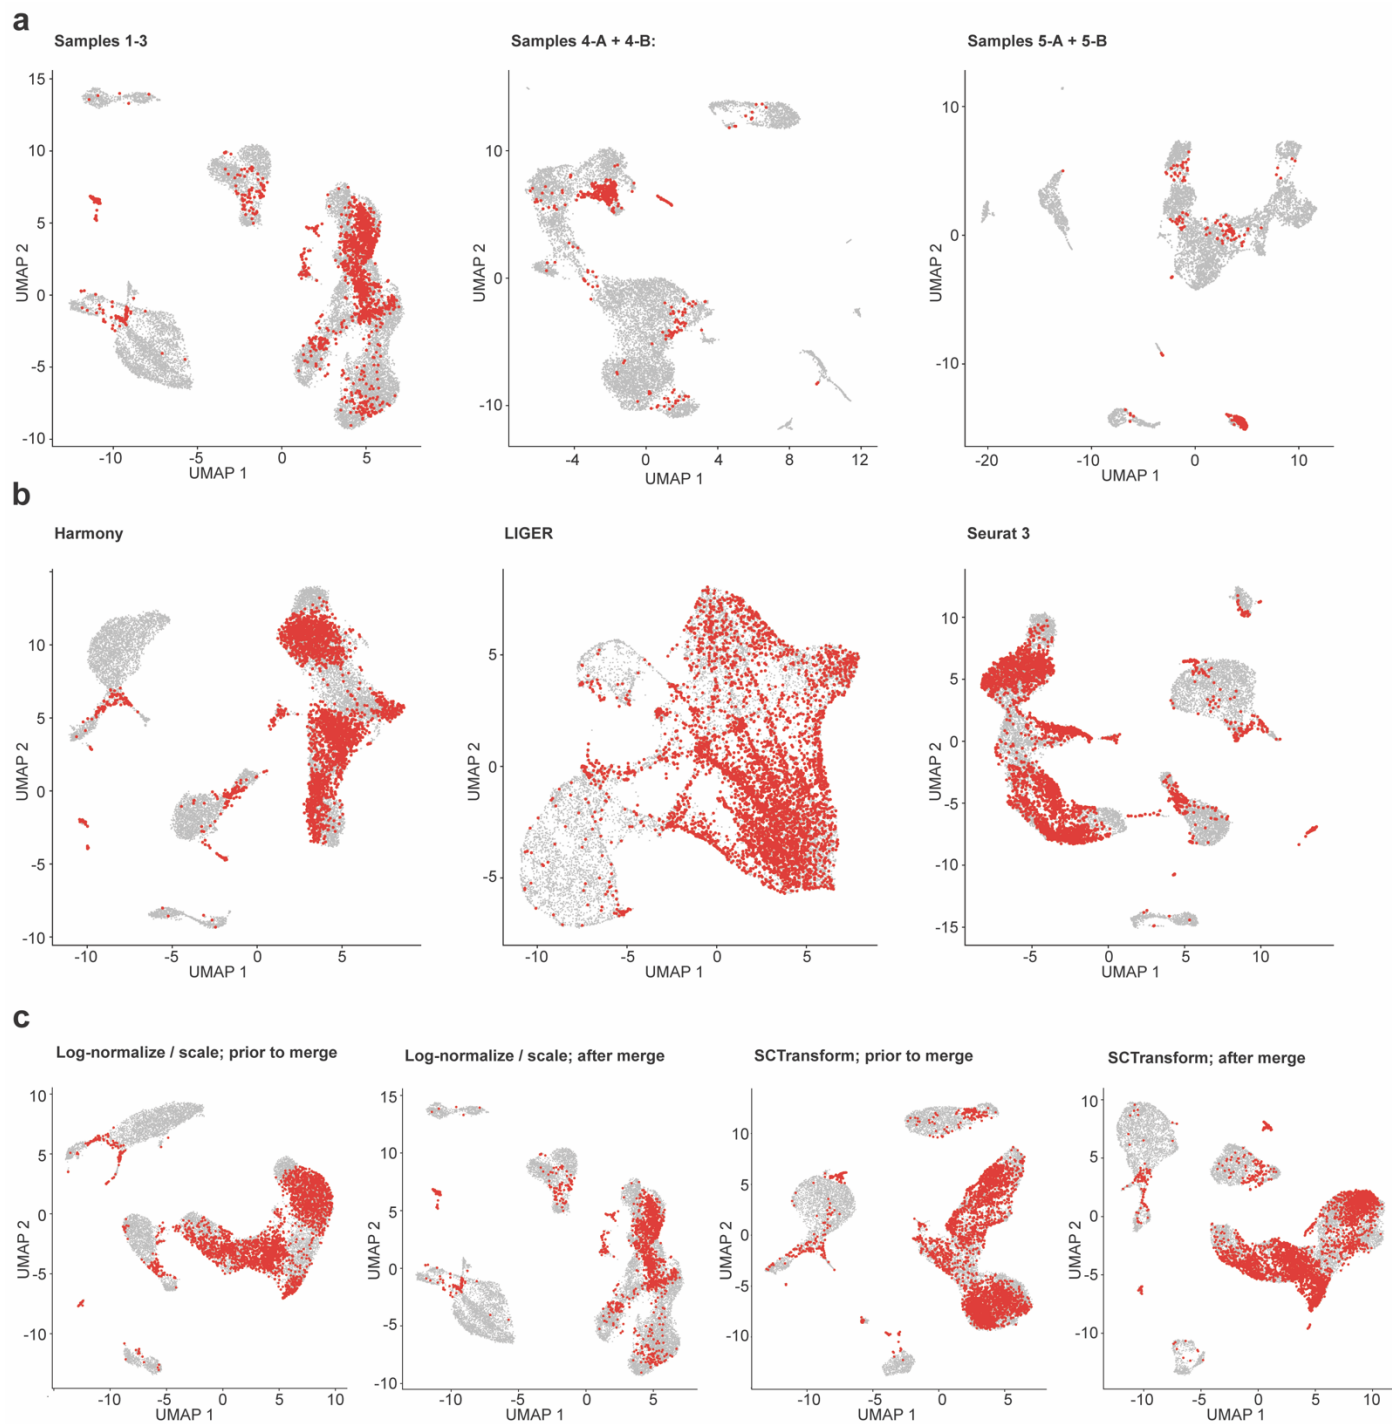

**Supplementary Figure 4. Distribution of misclassified cells after data merging.** Red points represent cells that change classification after data merging, as generated by the CMS scoring method. UMAPs and data generated for Figs. 2, 4, and 5.



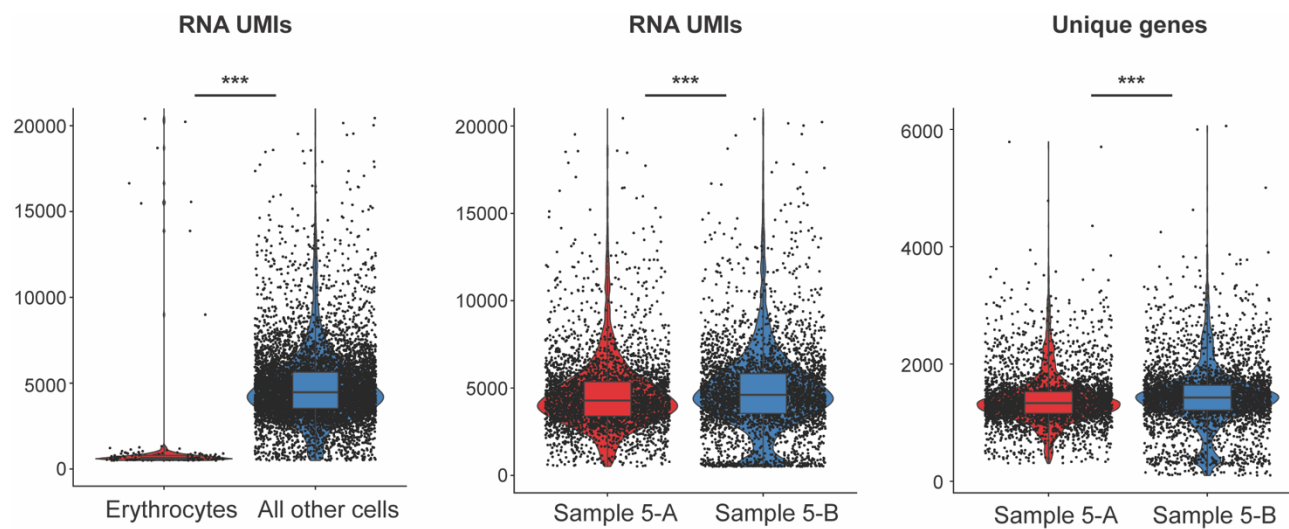

**Supplementary Figure 5. Comparison of sample 5 high- and low-depth sequencing replicates.**

Comparison of key metrics (number of UMI and number of unique genes) distinguishing high and low read-depth (reads per cell) sequencing replicates of sample 5. Also shown are the number of UMI for sample 5 erythrocytes, as compared to all non-erythrocyte cells. \*\*\* $p < 1 \times 10^{-9}$ , Wilcoxon rank-sum test.

**Supplementary Table 1. Donor demographics and library sequencing details**

| Donor ID | Sample ID       | Source Tissue | Sex | Age | Isolation method       | 10X Chemistry | ADT version | Sequence Platform | Flow cell | CellRanger Version | Reference genome    |
|----------|-----------------|---------------|-----|-----|------------------------|---------------|-------------|-------------------|-----------|--------------------|---------------------|
| Donor 1  | PBMC Sample 1   | PBMC          | M   | 37  | PBMC isolation SCT kit | 3' v2         | TotalSeq-A  | Novaseq           | S4-300    | 3.0.1              | GRCh38 (Ensembl 93) |
| Donor 2  | PBMC Sample 2   | PBMC          | F   | 41  | PBMC isolation SCT kit | 3' v2         | TotalSeq-A  | Novaseq           | S4-300    | 3.0.1              | GRCh38 (Ensembl 93) |
| Donor 3  | PBMC Sample 3   | PBMC          | F   | 43  | PBMC isolation SCT kit | 3' v2         | TotalSeq-A  | Novaseq           | S4-300    | 3.0.1              | GRCh38 (Ensembl 93) |
| Donor 4  | PBMC Sample 4-A | PBMC          | M   | 46  | PBMC isolation SCT kit | 5' v1         | TotalSeq-C  | Novaseq           | S4-300    | 3.1.0              | GRCh38 (Ensembl 93) |
| Donor 4  | PBMC Sample 4-B | PBMC          | M   | 46  | PBMC isolation SCT kit | 5' v1         | TotalSeq-C  | Novaseq           | S4-300    | 3.1.0              | GRCh38 (Ensembl 93) |
| Donor 5  | PBMC Sample 5-A | PBMC          | F   | 36  | PBMC isolation SCT kit | 5' v1         | TotalSeq-C  | Novaseq           | S4-300    | 3.1.0              | GRCh38 (Ensembl 93) |
| Donor 5  | PBMC Sample 5-B | PBMC          | F   | 36  | PBMC isolation SCT kit | 5' v1         | TotalSeq-C  | Novaseq           | S4-300    | 3.1.0              | GRCh38 (Ensembl 93) |

| <b>Reads</b> | <b>Cells</b> |
|--------------|--------------|
| 582,860,987  | 5778         |
| 582,860,987  | 5178         |
| 582,860,987  | 6121         |
| 582,860,987  | 6392         |
| 582,860,987  | 6423         |
| 582,860,987  | 3783         |
| 582,860,987  | 4034         |

**Supplementary Table 2. Cell-type and cluster composition (fraction of total sample)**

| Cell-type composition by samples          |             |             |             |             |             |             |             |
|-------------------------------------------|-------------|-------------|-------------|-------------|-------------|-------------|-------------|
| Cell type                                 | B Naive     | B Memory    | T CD4       | TReg        | T CD8       | NK_T        | NK          |
| PBMC Sample 4-A                           | 0.067748543 | 0.030880731 | 0.472664251 | 0.02851741  | 0.062391681 | 0.086394675 | 0.162596502 |
| PBMC Sample 4-B                           | 0.06761845  | 0.031220584 | 0.473956699 | 0.028082837 | 0.062598055 | 0.084719172 | 0.1625353   |
| PBMC Sample 5-A                           | 0.041522491 | 0.02874634  | 0.410700027 | ---         | 0.076124567 | 0.26031408  | 0.047112057 |
| PBMC Sample 5-B                           | 0.038682306 | 0.027202396 | 0.395557774 | ---         | 0.072373347 | 0.246568505 | 0.044172698 |
| PBMC Sample 5-A<br>(Erythrocytes Removed) | 0.041655541 | 0.028838451 | 0.412016021 | ---         | 0.076368491 | 0.261148198 | 0.047263017 |
| PBMC Sample 5-B<br>(Erythrocytes Removed) | 0.040714473 | 0.028631468 | 0.416338324 | ---         | 0.076175466 | 0.259521933 | 0.046493302 |
| Cluster composition by samples            |             |             |             |             |             |             |             |
| Cluster                                   | 0           | 1           | 2           | 3           | 4           | 5           | 6           |
| PBMC Sample 4-A                           | 0.20529384  | 0.108870332 | 0.081770915 | 0.080825587 | 0.075783835 | 0.076098944 | 0.074996061 |
| PBMC Sample 4-B                           | 0.203953561 | 0.108095388 | 0.080953875 | 0.081581425 | 0.076090367 | 0.075462818 | 0.07530593  |
| PBMC Sample 5-A                           | 0.118179398 | 0.102475379 | 0.097684323 | 0.085174341 | 0.083311153 | 0.083311153 | 0.076124567 |
| PBMC Sample 5-B                           | 0.10706264  | 0.093835787 | 0.095333167 | 0.079111555 | 0.080359371 | 0.079361118 | 0.072373347 |

| NK CD56HI   | Monocyte_C1<br>assical | Monocyte_No<br>nClassical | Dendritic_Cel<br>ls | HSPCs       | Cycling_Cells | Erythrocytes |             |             |
|-------------|------------------------|---------------------------|---------------------|-------------|---------------|--------------|-------------|-------------|
| 0.033401607 | 0.031668505            | 0.010241059               | 0.008192847         | 0.002835986 | 0.003466205   | ---          |             |             |
| 0.033260119 | 0.031377471            | 0.010197678               | 0.008158142         | 0.002823972 | 0.003451522   | ---          |             |             |
| ---         | 0.098749002            | 0.022624434               | 0.010912962         | ---         | ---           | 0.003194038  |             |             |
| ---         | 0.093835787            | 0.021462441               | 0.010232094         | ---         | ---           | 0.049912653  |             |             |
| ---         | 0.099065421            | 0.022696929               | 0.010947931         | ---         | ---           | ---          |             |             |
| ---         | 0.098765432            | 0.022589966               | 0.010769635         | ---         | ---           | ---          |             |             |
| 7           | 8                      | 9                         | 10                  | 11          | 12            | 13           | 14          | 15          |
| 0.067748543 | 0.037655585            | 0.033401607               | 0.031668505         | 0.02851741  | 0.025366315   | 0.024736096  | 0.010241059 | 0.00929573  |
| 0.06761845  | 0.03796674             | 0.033260119               | 0.031377471         | 0.028082837 | 0.025729526   | 0.024631315  | 0.010197678 | 0.009256354 |
| 0.068937982 | 0.065211605            | 0.047112057               | 0.04285334          | 0.041522491 | 0.02874634    | 0.003194038  | 0.022624434 | 0.015437849 |
| 0.066633392 | 0.060144747            | 0.044172698               | 0.039430996         | 0.038682306 | 0.027202396   | 0.049912653  | 0.021462441 | 0.014474669 |



### Supplementary Table 3. Key reagents and resources

| Antigen             | Clone     | Vendor    | Cat. no. | 10X Chemistry compatibility |
|---------------------|-----------|-----------|----------|-----------------------------|
| CD34 (gp105-120)    | 581       | Biolegend | 343537   | 3'                          |
| CD24 (Ly-52)        | ML5       | Biolegend | 311137   | 3'                          |
| CD138 (Syndecan-1)  | MI15      | Biolegend | 356533   | 3'                          |
| CD3 (T3, CD3ε)      | UCHT1     | Biolegend | 300475   | 3'                          |
| Annexin V           | Annexin   | Biolegend | 94700    | 3'                          |
| CD16 (FcγRIII)      | 3G8       | Biolegend | 302061   | 3'                          |
| IgD                 | IA6-2     | Biolegend | 348243   | 3'                          |
| IgM                 | MHM-88    | Biolegend | 314541   | 3'                          |
| CD56 (NCAM-1)       | 5.1H11    | Biolegend | 362557   | 3'                          |
| CD127 (IL-7Ra)      | A019D5    | Biolegend | 351352   | 3'                          |
| CD38 (T10)          | HIT2      | Biolegend | 303541   | 3'                          |
| CD20 (B1)           | 2H7       | Biolegend | 302359   | 3'                          |
| CD27 (S152)         | O323      | Biolegend | 302847   | 3'                          |
| CD14 (LPS receptor) | 63D3      | Biolegend | 367131   | 3'                          |
| CD19 (B4)           | HIB19     | Biolegend | 302259   | 3'                          |
| CD5 (Ly-1)          | UCHT2     | Biolegend | 300635   | 3'                          |
| CD43 (Ly-48)        | CD43-10G7 | Biolegend | 343209   | 3'                          |
| CD25                | BC96      | Biolegend | 302643   | 3'                          |
| CD4                 | SK3       | Biolegend | 344649   | 3'                          |
| CD8                 | SK1       | Biolegend | 344751   | 3'                          |
| CCR7 (CD197)        | G043H7    | Biolegend | 353251   | 5'                          |
| CD11b               | ICRF44    | Biolegend | 301359   | 5'                          |
| CD127 (IL-7Ra)      | A019D5    | Biolegend | 351356   | 5'                          |
| CD14 (LPS receptor) | M5E2      | Biolegend | 301859   | 5'                          |
| CD16 (FcγRIII)      | 3G8       | Biolegend | 302065   | 5'                          |
| CD19 (B4)           | HIB19     | Biolegend | 302265   | 5'                          |
| CD20 (B1)           | 2H7       | Biolegend | 302363   | 5'                          |
| CD21 (C3dR)         | Bu32      | Biolegend | 354923   | 5'                          |
| CD25                | BC96      | Biolegend | 302649   | 5'                          |
| CD27 (S152)         | O323      | Biolegend | 302853   | 5'                          |
| CD3 (T3, CD3ε)      | UCHT1     | Biolegend | 300479   | 5'                          |
| CD38 (T10)          | HIT2      | Biolegend | 303543   | 5'                          |
| CD4                 | RPA-T4    | Biolegend | 300567   | 5'                          |
| CD45                | 2D1       | Biolegend | 368545   | 5'                          |
| CD45RA              | HI100     | Biolegend | 304163   | 5'                          |
| CD56                | QA17A16   | Biolegend | 392425   | 5'                          |

|                                                |              |               |                 |    |
|------------------------------------------------|--------------|---------------|-----------------|----|
| CD69                                           | FN50         | Biolegend     | 310951          | 5' |
| CD80                                           | 2D10         | Biolegend     | 305243          | 5' |
| CD86                                           | IT2.2        | Biolegend     | 305447          | 5' |
| CD8a                                           | RPA-T8       | Biolegend     | 301071          | 5' |
| CD95 (APO-1)                                   | DX2          | Biolegend     | 305651          | 5' |
| HLA-DR                                         | L243         | Biolegend     | 307663          | 5' |
| PDL1 (CD274)                                   | 29E.2A3      | Biolegend     | 329751          | 5' |
| IgM                                            | MHM-88       | Biolegend     | 314547          | 5' |
| <b><i>Custom oligo-conjugated in house</i></b> |              |               |                 |    |
| <b>Antigen</b>                                 | <b>Clone</b> | <b>Vendor</b> | <b>Cat. no.</b> |    |
| CD11c ( $\alpha$ X integrin)                   | S-HCL-3      | Biolegend     | 371502          | 5' |
| CD133 (Prominin-1)                             | clone 7      | Biolegend     | 372802          | 5' |
| CD138 (Syndecan-1)                             | MI15         | Biolegend     | 356502          | 5' |
| CD24 (Ly-52)                                   | ML5          | Biolegend     | 311102          | 5' |
| CD34 (gp105-120)                               | 581          | Biolegend     | 343602          | 5' |
| CD41 (gpIIb)                                   | HIP8         | Biolegend     | 303702          | 5' |
| CD43 (Ly-48)                                   | CD43-10G7    | Biolegend     | 343202          | 5' |
| CD45R (B220)                                   | RA3-6B2      | Biolegend     | 103202          | 5' |
| CD5 (Ly-1)                                     | UCHT2        | Biolegend     | 300602          | 5' |
| IgD                                            | IA6-2        | Biolegend     | 348212          | 5' |
| CD20 (B1)                                      | 2H7          | Biolegend     | 302302          | 5' |
